**1 Lung type II alveolar epithelial cells collaborate with CCR2<sup>+</sup> inflammatory monocytes in  
2 host defense against an acute vaccinia infection in the lungs**

Ning Yang<sup>1\*</sup>, Joseph M. Luna<sup>2</sup>, Peihong Dai<sup>1</sup>, Yi Wang<sup>1</sup>, Charles M. Rice<sup>2</sup>, and Liang Deng<sup>1,2,3\*</sup>

<sup>1</sup>Dermatology Service, Department of Medicine, Memorial Sloan Kettering Cancer Center, New York, New York, USA.

<sup>2</sup>The Laboratory of Virology and Infectious Disease, The Rockefeller University, New York, NY, United States.

<sup>3</sup>Weill Cornell Medical College, New York, New York, USA.

\*corresponding authors. Mailing address for Liang Deng and Ning Yang: Dermatology Service, Department of Medicine, Memorial Sloan Kettering Cancer Center, 1275 York Ave., New York, NY 10065. Email: [dengl@mskcc.org](mailto:dengl@mskcc.org); [yangn@mskcc.org](mailto:yangn@mskcc.org).

### 3 SUMMARY

4 The pulmonary immune system consists of a network of tissue-resident cells as well as immune  
5 cells that are recruited to the lungs during infection and/or inflammation. How the two immune  
6 components cross-talk during an acute viral infection is not well understood. Intranasal infection  
7 of mice with vaccinia virus causes lethal pneumonia and systemic dissemination. Here we report  
8 that vaccinia host range protein C7 is a critical virulence factor. Vaccinia virus with deletion of C7  
9 (VACV $\Delta$ C7L) is non-pathogenic in wild-type C57BL/6J mice, but it gains virulence in mice  
10 lacking STAT2, or IFNAR1, or MDA5/STING. We provide evidence that lung type II alveolar  
11 epithelial cells (AECs) provide first-line of defense against VACV $\Delta$ C7L infection by inducing  
12 IFN- $\beta$  and IFN-stimulated genes via the activation of the MDA5 and STING-mediated nucleic  
13 acid-sensing pathways. This leads to recruitment of CCR2<sup>+</sup> inflammatory monocytes into the lungs  
14 to fight against viral dissemination.

Keywords: poxvirus, innate immunity, lung type II AECs, type I IFN, IFN-stimulated genes, STING, MDA5, inflammatory monocytes

## 15 INTRODUCTION

16

17 Poxviruses are large cytoplasmic DNA viruses that are important human and veterinary pathogens.  
18 Smallpox, a highly contagious infectious disease with a high mortality rate that had claimed  
19 hundreds of millions of lives throughout the history, is caused by a human specific poxvirus--  
20 variola virus--through inhalation of airborne droplets. Prior to Edward Jenner's vaccination using  
21 skin scarification with cowpox, variolation by inhalation of dried smallpox scabs was practiced in  
22 China as early as in the 10<sup>th</sup> century to induce immunity against smallpox. Later, vaccinia virus  
23 became the vaccine strain of choice against smallpox and was used successfully throughout the  
24 world, which lead to smallpox eradication in 1980.

25

26 Studies on intranasal infection with vaccinia virus using mice may shed light on how the lung  
27 immune system defends against poxvirus infection. Extensive studies have been conducted to  
28 evaluate the pathogenicity of the virus and to define its virulence factors. By using genetic  
29 knockout mice or cell type depletion antibodies, several immune cell types and factors have been  
30 defined to play important roles in host defense against vaccinia infection. For example, antiviral  
31 CD8<sup>+</sup> T cells and IFN- $\gamma$  production by these cells are important for viral clearance (Goulding et  
32 al., 2014; Goulding et al., 2012). Batf3<sup>-/-</sup> mice are more susceptible to VACV infection with more  
33 weight loss after infection, supporting a role of CD103<sup>+</sup>/CD8 $\alpha$ <sup>+</sup> DCs in cross-priming CD8<sup>+</sup> T  
34 cells (Desai et al., 2018). In addition, cGAS<sup>-/-</sup> mice are more susceptible to VACV infection, which  
35 suggests that cGAS-dependent DNA sensing is important for host defense against a DNA virus  
36 (Schoggins et al., 2014). All of these studies were performed using a low dose of wild type (WT)  
37 VACV infection because of the virulence nature of this virus.

38

39 Lung alveolar epithelial cells (AECs) provide both physical and biochemical barriers against  
40 respiratory infectious agents and provide first-line defense in an intranasal infection model. It has  
41 been generally accepted that lung type II AECs (AECII) respond to respiratory RNA virus  
42 infection (Stegemann-Koniszewski et al., 2016). However, the immunological response of lung  
43 AECII to a DNA virus infection has not been demonstrated.

44

45 In this study, we first demonstrated that vaccinia host range protein C7 is a virulence factor.  
46 VACV $\Delta$ C7L is non-pathogenic in WT C57BL/6J mice at a high dose of infection intranasally, but  
47 gained virulence in STAT2, IFNAR1, or MDA5/STING-deficient mice. VACV $\Delta$ C7L is non-  
48 pathogenic in RAG1-deficient mice, which lack T and B cells. Thus, this attenuated VACV mutant  
49 provides us with a model to evaluate the lung innate immune responses to acute pulmonary  
50 infection with a DNA virus. We found that VACV $\Delta$ C7L infection triggers the release of IFN- $\beta$ ,  
51 CCL2, CXCL9, and CXCL10 into bronchioalveolar (BAL), whereas WT VACV infection fails to  
52 do so. Infection of primary lung AECII with VACV $\Delta$ C7L *in vitro* leads to the induction of IFNB  
53 and IFN-stimulated genes (ISGs), which is dependent on the MDA5-dependent cytosolic dsRNA-  
54 sensing pathway as well as the STING-dependent cytosolic DNA-sensing pathway.

55  
56 Given that both IFNAR1 and STAT2-deficient mice are more susceptible to VACV $\Delta$ C7L  
57 infection, we hypothesize that type I IFN signaling plays an important role in restricting  
58 VACV $\Delta$ C7L, either through stimulating IFNAR on the lung AEC and/or hematopoietic cell  
59 populations. To probe the relative contributions of lung non-hematopoietic resident cells versus  
60 hematopoietic cells in host defense against VACV $\Delta$ C7L, we generated bone marrow chimeric  
61 mice. Our results indicate that the IFNAR signaling on the non-hematopoietic cells (likely the  
62 AECII) plays a critical role in host defense, and IFNAR signaling on hematopoietic cells also  
63 contributes. Using IFNAR1<sup>fl/fl</sup>-Sftpc<sup>cre-ERT2</sup> mice, we showed that type I IFN signaling on lung  
64 AECIIs is important for host defense against VACV $\Delta$ C7L infection.

65  
66 To probe whether myeloid cells play a role in host defense against VACV $\Delta$ C7L infection, we  
67 transiently depleted CCR2<sup>+</sup> inflammatory monocytes in CCR2-DTR mice through administration  
68 of diphtheria toxin (DT), and found that depletion of CCR2<sup>+</sup> inflammatory monocytes renders the  
69 mice susceptible to VACV $\Delta$ C7L infection. Using CCR2-GFP mice, we found that after  
70 VACV $\Delta$ C7L infection, CCR2<sup>+</sup>Ly6C<sup>hi</sup> inflammatory monocytes are recruited into the lung  
71 parenchyma and differentiated into several populations, including Lyve1<sup>-</sup> interstitial macrophages  
72 (IMs), Lyve1<sup>+</sup> IMs, and DCs. Unlike WT mice, infection of MDA5/STING-deficient mice with  
73 VACV $\Delta$ C7L fails to recruit Ly6C<sup>+</sup> monocytes or to generate Lyve1<sup>-</sup> IMs.

74

75 Taken together, we have developed a novel pulmonary infection model using attenuated vaccinia  
76 virus VACV $\Delta$ C7L, which triggers MDA5/STING-dependent innate immunity in lung AECII cells.  
77 IFN- $\beta$  production and its signaling on the AECII plays a critical role for host control of viral  
78 replication and dissemination. Our study also revealed the important role of CCR2<sup>+</sup> inflammatory  
79 monocytes in host restriction of viral dissemination.

## 80 RESULTS

81

82 **A mutant vaccinia virus lacking the C7L gene (VACV $\Delta$ C7L) is highly attenuated in a murine**  
83 **intranasal infection model.** To test whether the vaccinia host range protein C7 is a virulence  
84 factor, we generated a mutant vaccinia (Western Reserve) strain lacking the C7L gene through  
85 homologous recombination. The recombinant virus VACV $\Delta$ C7L, which expresses mCherry under  
86 the vaccinia synthetic early/late promoter, is replication-competent in BSC40 cells (data not  
87 shown). We performed intranasal infection of WT VACV or VACV $\Delta$ C7L in 6-8 week old WT  
88 C57BL/6J mice. WT VACV infection at  $2 \times 10^6$  pfu per mouse caused rapid weight loss and 100%  
89 lethality (**Figures 1A and 1B**). WT VACV infection at  $2 \times 10^5$  pfu per mouse resulted in an average  
90 of 22% weight loss, and 40% mortality (**Figures 1A and 1B**). By contrast, VACV $\Delta$ C7L infection  
91 at the highest dose ( $2 \times 10^7$  PFU) results in less than 20% weight loss, and all of the mice recovered  
92 their weight at 11 to 12 days post infection (**Figures 1C and 1D**). These results demonstrate that  
93 VACV $\Delta$ C7L is attenuated by at least 100-fold compared with WT VACV in an intranasal infection  
94 model, and therefore C7 is a virulence factor.

95

96 **Type I IFN signaling is crucial for host control of VACV $\Delta$ C7L infection in the lungs.** To probe  
97 the mechanism of attenuation, we first tested whether type I IFN signaling is important for host  
98 defense against VACV $\Delta$ C7L. We intranasally infected WT, STAT2<sup>-/-</sup>, or IFNAR1<sup>-/-</sup> mice with  
99 VACV $\Delta$ C7L at a dose of  $2 \times 10^7$  pfu and monitored weight loss and survival of the mice over time.  
100 We found that in contrast to WT mice, the STAT2<sup>-/-</sup> and IFNAR<sup>-/-</sup> mice were highly susceptible to  
101 VACV $\Delta$ C7L infection, with rapid weight loss, severe illness, and death (**Figures 1E and 1F**). The  
102 median survival times for STAT2<sup>-/-</sup> and IFNAR1<sup>-/-</sup> mice were 7 days and 8 days, respectively  
103 (**Figure 1F**). We compared the viral titers in various tissues from WT, STAT2<sup>-/-</sup>, or IFNAR1<sup>-/-</sup>  
104 mice at day 4 post infection with VACV $\Delta$ C7L at  $2 \times 10^7$  pfu. We found that VACV $\Delta$ C7L infection  
105 of WT mice caused localized infection in the lungs without dissemination of the virus or viremia  
106 (**Figure 1I**). VACV $\Delta$ C7L infection caused higher viral titers in the lungs of STAT2<sup>-/-</sup> or IFNAR1<sup>-/-</sup>  
107 <sup>-/-</sup> mice compared with those in the WT mice (**Figure 1I**). We also observed viremia and  
108 dissemination of the virus to various distant organs including livers, spleens, and brains in STAT2<sup>-/-</sup>  
109 <sup>-/-</sup> and IFNAR1<sup>-/-</sup> mice (**Figure 1I**).

110

111 To determine the LD50 of VACV $\Delta$ C7L virus in STAT2<sup>-/-</sup> or IFNAR1<sup>-/-</sup> mice, we intranasally  
112 infected these mice with decreasing doses of VACV $\Delta$ C7L. Our results show that the LD50 of  
113 VACV $\Delta$ C7L in STAT2<sup>-/-</sup> and IFNAR1<sup>-/-</sup> mice is around 1000 pfu (**Figures S1A-S1D**).

114

115 **Both the cytosolic dsRNA and DNA-sensing pathways plays important roles in restricting**  
116 **pulmonary VACV $\Delta$ C7L infection.** We have previously shown that the cytosolic DNA- and  
117 dsRNA-sensing pathways are important for host immune detection of vaccinia infection, leading  
118 to type I IFN production in dendritic cells (DCs) and epithelial cells in a cell type-specific manner  
119 (Dai et al., 2014; Deng et al., 2008). cGAS<sup>-/-</sup> mice are highly susceptible to WT VACV infection  
120 (Schoggins et al., 2014). We performed intranasal infection of VACV $\Delta$ C7L at a dose of 2 x 10<sup>7</sup>  
121 pfu in cGAS<sup>-/-</sup>, STING<sup>Gt/Gt</sup>, MDA5<sup>-/-</sup>, or MDA5<sup>-/-</sup>STING<sup>Gt/Gt</sup> mice and found that the average  
122 percentages of weight loss were 10%, 14%, 18%, 24%, and 27% for WT, cGAS<sup>-/-</sup>, STING<sup>Gt/Gt</sup>,  
123 MDA5<sup>-/-</sup> and MDA5<sup>-/-</sup>STING<sup>Gt/Gt</sup> mice, respectively, at day 7 post infection. All of the WT, cGAS<sup>-/-</sup>,  
124 STING<sup>Gt/Gt</sup>, or MDA5<sup>-/-</sup> mice subsequently gained weight and recovered from acute illness. By  
125 contrast, all of the MDA5<sup>-/-</sup>STING<sup>Gt/Gt</sup> mice died at day 8 or 9 post infection (**Figures 1G and**  
126 **1H**). We compared viral titers in various organs harvested from WT, MDA5<sup>-/-</sup> and MDA5<sup>-/-</sup>  
127 STING<sup>Gt/Gt</sup> mice and found that although viral titers were higher in the infected lungs of MDA5<sup>-/-</sup>  
128 mice compared with those in WT mice, VACV $\Delta$ C7L infection was confined to the lungs in MDA5<sup>-/-</sup>  
129 mice. By contrast, in MDA5<sup>-/-</sup>STING<sup>Gt/Gt</sup> mice infected with VACV $\Delta$ C7L, we observed systemic  
130 dissemination of the virus at day 4 post infection (**Figure 1J**). These results are consistent with the  
131 differences in mortality in MDA5<sup>-/-</sup> and MDA5<sup>-/-</sup>STING<sup>Gt/Gt</sup> mice upon VACV $\Delta$ C7L infection  
132 (**Figure 1H**). Based on these results, we conclude that both the cytosolic dsRNA-sensing pathway  
133 mediated by MDA5 and the DNA-sensing pathway mediated by cGAS/STING play important  
134 roles in host restriction of vaccinia infection in the lungs and in preventing systemic dissemination.

135 **Intranasal infection of VACV $\Delta$ C7L leads to the production of type I IFN and**  
136 **proinflammatory cytokines and chemokines in the infected lungs.** We hypothesize that  
137 intranasal infection with VACV $\Delta$ C7L induces lung innate immunity including type I IFN  
138 production whereas WT vaccinia virus does not. To test that, we isolated bronchoalveolar lavage  
139 fluid (BAL) at day 1 and day 3 post infection with either WT VACV or VACV $\Delta$ C7L at 2 x 10<sup>7</sup>  
140 pfu. We found that at day 1 post infection, VACV $\Delta$ C7L induced detectable IFN- $\beta$  level in BAL,

141 whereas WT VACV did not. At day 3 post infection, VACV $\Delta$ C7L induced much higher levels  
142 IFN- $\beta$  levels in the BAL compared with those collected at day 1 post infection, whereas WT  
143 VACV had a very small induction of IFN- $\beta$  level at day 3 post infection (**Figures 2A and 2B**).  
144 Luminex analysis of proinflammatory cytokines and chemokines in the BAL showed that  
145 VACV $\Delta$ C7L infection resulted in the release of IL-6, Ccl2, IFN- $\gamma$ , CXCL10, CXCL9 into the  
146 BAL, whereas both WT VACV and VACV $\Delta$ C7L induced VEGF release (**Figures 2A and 2B**).

147

148 **Lung type II alveolar epithelial cells (ACEIIs) are the major producers of IFN- $\beta$  *in vivo* at**  
149 **an early phase of intranasal infection of VACV $\Delta$ C7L.** The lung epithelial cells and alveolar  
150 macrophages (AMs) provide the first line defense against pulmonary pathogen infection. To  
151 determine which cell population(s) are the major producer(s) of IFN- $\beta$  upon VACV $\Delta$ C7L  
152 infection, we used IFN- $\beta$ -yellow fluorescent protein (YFP) knockin mice to map the cell type(s)  
153 responsible for IFN- $\beta$  production induced by VACV $\Delta$ C7L infection. We found that the majority  
154 of IFN- $\beta$ /YFP positive cells are CD45<sup>-</sup>EpCAM<sup>+</sup> (**Figure 2C**). Confocal microscopy of lung  
155 sections from IFN- $\beta$ /YFP at day one post infection with VACV $\Delta$ C7L showed IFN- $\beta$ /YFP-positive  
156 cells that overlap with lung AECII marker *surfactant protein C (SP-C)* (**Figure 2D**). Although  
157 lung AMs can be infected with either WT VACV or VACV $\Delta$ C7L *in vivo* (data not shown),  
158 infection of AMs with either WT VACV or VACV $\Delta$ C7L *in vitro* does not result in IFNB gene  
159 induction or IFN- $\beta$  production (**Figures S2A and S2B**). To test whether AMs can respond to  
160 poxvirus infection, we infected them with a highly attenuated modified vaccinia virus Ankara  
161 (MVA), which is non-replicative in most mammalian cells. We have previously shown that MVA  
162 infection in conventional dendritic cells (cDCs) induces type I IFN production via the  
163 cGAS/STING/IRF3-mediated cytosolic DNA-sensing pathway (Dai et al., 2014). We found that  
164 MVA infection of AMs induces IFNB gene expression and IFN- $\beta$  production (**Figures S2A and**  
165 **S2B**). and MVA $\Delta$ C7L induces higher levels of IFNB gene expression and protein secretion  
166 compared with MVA (**Figures S2A and S2B**). These results provide evidence to support that  
167 vaccinia C7 plays an inhibitory role of the IFN production pathway and also suggest that there are  
168 additional vaccinia inhibitors of the cGAS/STING/IRF3 pathway that prevent the induction of  
169 IFNB in AMs by VACV $\Delta$ C7L.

170



171 **Primary murine lung AECIIs induces *Ifnb*, *Ccl4*, and *Ccl5* gene expression and protein**  
172 **secretion in a MDA5/STING-dependent manner upon VACV $\Delta$ C7L infection.** To firmly  
173 establish that the lung AECIIs are capable of producing IFN- $\beta$  and proinflammatory chemokines  
174 upon VACV $\Delta$ C7L infection and to test whether the induction is dependent on the MDA5 and  
175 STING-mediated cytosolic dsRNA and DNA-sensing pathways, we isolated the lineage negative  
176 epithelial progenitor cells, CD45<sup>-</sup>CD16/CD32<sup>-</sup>CD31<sup>-</sup>EpCAM<sup>+</sup>CD104<sup>+</sup>, from the lungs of WT and  
177 MDA5<sup>-/-</sup>STING<sup>Gt/Gt</sup> mice. The cells were cultured *in vitro* to allow differentiation into AECIIs. *SP-*  
178 *C* expression was determined by FACS analysis as well as immunofluorescence staining to  
179 confirm AECII identity (**Figures 2E and 2F**). We next tested the replication capacities of WT  
180 VACV and VACV $\Delta$ C7L in primary lung AECII and found that they were similar (**Figure 2G**).  
181 To test the innate immune responses of lung AECIIs to WT VACV or VACV $\Delta$ C7L infection,  
182 AECII from WT and MDA5<sup>-/-</sup>STING<sup>Gt/Gt</sup> mice were infected with either WT VACV or  
183 VACV $\Delta$ C7L at a multiplicity of infection (MOI) of 10. The cells were collected at 12 h post  
184 infection and quantitative PCR analyses were performed. We found that infection of WT lung  
185 epithelial cells with VACV $\Delta$ C7L induced higher levels of expression of *Ifnb*, *Ccl4*, and *Ccl5*  
186 compared with WT VACV (**Figure 2H**). ELISA analysis of supernatants collected at 24 h post  
187 infection with either WT VACV or VACV $\Delta$ C7L showed that VACV $\Delta$ C7L infection resulted in  
188 the secretion of IFN- $\beta$ , CCL4 and CCL5 by WT AECIIs. By contrast, the MDA5<sup>-/-</sup>STING<sup>Gt/Gt</sup>  
189 AECII failed to induce *Ifnb*, *Ccl4*, and *Ccl5* gene expression and to produce IFN- $\beta$ , CCL4 and  
190 CCL5 upon VACV $\Delta$ C7L infection (**Figures 2H and 2I**). However, MDA5-deficient AECIIs had  
191 modest reduction of IFNB gene expression and IFN- $\beta$  secretion compared with WT cells in  
192 response to VACV $\Delta$ C7L and STING-deficient AECII had similar capacities to induce IFNB in  
193 response to VACV $\Delta$ C7L (**Figures S2C and S2D**). These results demonstrate that the induction of  
194 *Ifnb*, *Ccl4*, and *Ccl5* gene expression and protein secretion by VACV $\Delta$ C7L is dependent on both  
195 MDA5 and STING.

196

197 **Vaccinia C7 inhibits IFNB gene induction by innate immune pathways and type I IFN**  
198 **signaling.** To understand the mechanism by which vaccinia C7 antagonizes the IFN pathway, we  
199 utilized a dual-luciferase assay system to evaluate the role of vaccinia C7 in the regulation of  
200 STING, TBK1, MAVS, TRIF, TLR3, or IRF3-induced IFNB promoter activation in HEK293T  
201 cells. HEK293T cells were transfected with plasmids expressing IFNB-firefly luciferase reporter,

202 a control plasmid pRL-TK that expresses *Renilla* luciferase, innate immune sensor/adaptor, and  
203 vaccinia C7L, as indicated. Dual luciferase assays were performed at 24 h post transfection. The  
204 relative luciferase activity was expressed as arbitrary units by normalizing firefly luciferase  
205 activity to *Renilla* luciferase activity. Overexpression of STING resulted in a 30-fold induction of  
206 IFNB promoter activity compared with that in the control sample without STING. Co-transfection  
207 of increasing amounts of C7L expression plasmid led to a significant reduction of STING-induced  
208 IFNB promoter activity (**Figure 3A**). Similarly, overexpression of TBK1 resulted in a 400-fold  
209 induction of IFNB promoter activity compared with the control. Co-transfection of increasing  
210 amounts of C7L expression plasmid led to an over 90% reduction of TBK1-induced IFNB  
211 promoter activity (**Figure 3B**). The TBK1-IRF3 axis is important for signal transduction in several  
212 pathways, including cGAS-cGAMP-STING, RIG-I/MDA5-MAVS, TLR3-TRIF. MAVS or TRIF  
213 overexpression induced a 500-fold induction of IFNB promoter activity compared with the control.  
214 C7 blocked the MAVS or TRIF-induced luciferase signal by 70% (**Figure 3C and 3D**).  
215 Transfection of TLR3 and treatment with poly I:C resulted in a 9-fold induction of IFNB promoter  
216 activity compared with an empty vector control (**Figure 3E**). Overexpression of C7 resulted in  
217 the reduction of poly (I:C)/TLR3-induced IFNB promoter activity by up to 90% (**Figure 3E**).  
218 These results indicate that overexpression of C7 in HEK293T cells exerts an inhibitory effect on  
219 STING, MAVS, TLR3/poly (I:C), TRIF, and TBK1-induced IFNB promoter activity. IRF3 is a  
220 member of the interferon regulatory transcription factor (IRF) family and it is an essential  
221 transcription factor for the IFNB promoter. Since TBK1/IRF3 is a common node in these diverse  
222 DNA- and RNA-sensing pathways, it is possible that C7 targets the step that leads to the activation  
223 of IRF3, resulting in the failure of IRF3 phosphorylation. We found that over-expression of C7  
224 caused a 70% reduction of IRF3-induced IFNB promoter activity (**Figure 3F**), whereas  
225 overexpression of C7 failed to reduce IRF3-5D-induced IFNB promoter activity (**Figure 3G**).  
226 IRF3-5D is a constitutive active, phosphorylation-mimetic mutation of IRF3. In addition, we found  
227 that C7 does not affect NFkB gene activation induced by TRIF overexpression (**Figure 3H**).  
228 Taken together, our results indicate that C7 functions through inhibition of IRF3 activation.

229  
230 **Overexpression of vaccinia C7 in immune cells inhibits IFNB gene induction and IFN- $\beta$**   
231 **signaling.** To assess the effect of vaccinia C7 in IFNB gene induction in immune cells, we  
232 generated two cell lines stably expressing vaccinia C7, including murine macrophage RAW264.7

233 and human THP-1. An empty vector with a drug selection marker was also used to generate a  
234 control cell line. THP-1 stable cell line expressing C7 or with an empty vector were differentiated  
235 by phorbol-12-myristate-13-acetate (PMA) for 3 days before they were used for the experiments.  
236 The cells were either infected with Sendai virus (SeV), or heat-inactivated MVA (Heat-iMVA), or  
237 they were incubated with poly I:C, or transfected with interferon stimulatory DNA (ISD), a 45-bp  
238 non-CpG oligomer from *Listeria monocytogenes*. After 24 h, the IFNB gene expression level was  
239 measured by quantitative real-time PCR. SeV infection induced the highest level of IFNB gene  
240 expression in both RAW264.7 and THP-1 cells among all of the stimuli used in this experiment,  
241 and the overexpression of vaccinia C7 resulted in the reduction IFNB gene expression by 67% and  
242 68%, respectively (**Figure 3I, 3K**). Vaccinia C7 also attenuated poly (I:C)-induced IFNB gene  
243 expression in RAW264.7 and THP-1 cells by 73% and 75%, respectively (**Figure 3I, 3K**).  
244 Similarly, vaccinia C7 reduced Heat-iMVA-induced IFNB gene expression in RAW264.7 and  
245 THP-1 cells by 64% and 71%, respectively (**Figure 3J, 3L**). Furthermore, vaccinia C7 reduced  
246 ISD-induced IFNB gene expression in RAW264.7 by 68% (**Figure 3J**). SeV is a negative-sense,  
247 single-stranded RNA virus that belongs to the paramyxoviridae family. SeV infection can be  
248 sensed by the cytoplasmic RNA sensors, including retinoic-acid inducible gene-I (RIG-I) and  
249 melanoma differentiation-associated gene 5 (MDA-5) (Gitlin et al., 2010; Kawai et al., 2005). This  
250 can lead to the activation of the MAVS/TBK1/IRF3 axis. Poly (I:C) activates the endosomal  
251 dsRNA sensor, TLR3, which leads to activation of the TRIF/TBK1/IRF3 axis. Heat-iMVA  
252 activates the cytosolic DNA-sensor cGAS, which leads to the generation of the second messenger,  
253 cyclic GMP-AMP (cGAMP), and the activation of the STING/TBK1/IRF3 axis (Dai et al., 2017).  
254 Taken together, these results indicate that vaccinia C7 inhibits multiple innate immune sensing  
255 pathways in macrophages.

256 **Vaccinia C7 downregulates IRF3 phosphorylation in BMDCs induced by MVA.** We found  
257 that similar to infection in lung alveolar macrophages, MVA $\Delta$ C7L induced higher levels of  
258 IFNB gene expression compared with MVA in BMDCs (**Figure 3M**). Whereas neither WT  
259 VACV nor VACV $\Delta$ C7L induced IFN- $\beta$  secretion in BMDCs, both MVA and MVA $\Delta$ C7L  
260 infection triggered IFN- $\beta$  production, with MVA $\Delta$ C7L inducing higher levels of IFN- $\beta$  secretion  
261 in BMDCs compared with MVA (**Figure 3N**). Western blot analysis showed that MVA $\Delta$ C7L

262 infection of BMDCs also induced higher levels of phosphorylation of IRF3 compared with  
263 MVA, indicating that C7 might block IRF3 phosphorylation (**Figure 3O**).

264

265 **Vaccinia C7 interacts with IRF3.** To probe the mechanisms by which vaccinia C7 exerts its  
266 inhibitory effects on IRF3 phosphorylation, a co-immunoprecipitation assay was performed to  
267 determine whether vaccinia C7 interacts with IRF3. HEK293T cells were co-transfected with Flag-  
268 tagged IRF3 or C7 either alone or in combination. The whole cell lysates (WCL) were prepared  
269 and blotted with anti-FLAG and anti-C7 antibodies, which showed the expression of IRF3 and C7  
270 in transfected cells (**Figure 3P**). Following immunoprecipitation of the whole cell lysates with an  
271 anti-C7 antibody, the C7-interacting proteins were then probed with an anti-Flag antibody. We  
272 observed that the Flag-tagged IRF3 was pulled down by the anti-C7 antibody from whole cell  
273 lysates (**Figure 3Q**). Taken together, our results show that C7 interacts with IRF3 to mediate its  
274 inhibitory effects on IFN gene induction.

275

276 **Type I IFN signaling on lung non-hematopoietic resident cells plays a critical role in host**  
277 **defense against VACV $\Delta$ C7L infection.** VACV $\Delta$ C7L gains virulence in IFNAR1<sup>-/-</sup> or STAT2<sup>-/-</sup>  
278 mice in an intranasal infection model, which indicates that type I IFN signaling is crucial for  
279 controlling VACV $\Delta$ C7L infection. To distinguish the contributions of IFNAR signaling in  
280 hematopoietic cells vs. non-hematopoietic cells to host restriction of VACV $\Delta$ C7L infection in the  
281 lungs, we generated bone marrow chimeras and infected them with VACV $\Delta$ C7L intranasally at 2  
282 x 10<sup>7</sup> pfu. Analysis of CD45.1 and CD45.2 markers of immune cells in the bone marrow chimeras  
283 showed the desired reconstitution of hematopoietic cells in the blood (**Figure S3A-S3D**).  
284 VACV $\Delta$ C7L infection in WT → WT mice resulted in transient weight loss and all of the mice  
285 survived the infection. By contrast, VACV $\Delta$ C7L infection in Ifnar1<sup>-/-</sup> → Ifnar1<sup>-/-</sup> mice resulted in  
286 rapid weight loss and 100% mortality (**Figure 4A and 4B**). All of the Ifnar1<sup>-/-</sup> recipient mice  
287 reconstituted with WT bone marrow cells succumbed to VACV $\Delta$ C7L infection, indicating that  
288 type I IFN signaling on non-hematopoietic resident cells are important for host restriction of  
289 VACV $\Delta$ C7L infection (**Figure 4A and 4B**). By contrast, all of the WT recipient mice reconstituted  
290 with Ifnar1<sup>-/-</sup> bone marrow cells survived despite losing more weight compared with WT recipient  
291 mice reconstituted with WT bone marrow cells. This suggests that type I IFN signaling on

292 hematopoietic resident cells contribute to host defense against VACV $\Delta$ C7L but with a limited  
293 capacity (**Figure 4A and 4B**).

294

295 **Lung AECIIs are crucial targets of type I IFN induced by VACV $\Delta$ C7L intranasal infection.**

296 Given that lung AECIIs are the major early producers of IFN- $\beta$  upon intranasal VACV $\Delta$ C7L  
297 infection and type I IFN signaling on non-hematopoietic resident cells plays a crucial role in  
298 controlling VACV $\Delta$ C7L infection, we hypothesized that IFN signaling on lung AECII is important  
299 for restricting VACV $\Delta$ C7L infection in the lungs. To test that, we used *Ifnar1<sup>fl/fl</sup>-Sftpc<sup>creERT2</sup>* mice,  
300 which lacks IFNAR1 specifically in lung AECII upon tamoxifen-induced cre expression (Rock et  
301 al., 2011). Whereas the control mice had mild transient weight loss upon VACV $\Delta$ C7L infection,  
302 all of the *Ifnar1<sup>fl/fl</sup>-Sftpc<sup>creERT2</sup>* mice suffered severe weight loss and were euthanized at day 7 or 8  
303 post infection when they lost more than 30% of their original weight (**Figure 4C and 4D**) Viral  
304 titers in various organs including blood were determined from these animals. We only detected  
305 high viral titers in the lungs and brains, but not in the liver, spleen, ovaries, or blood (**Figure 4E**).  
306 These results indicate that type I IFN signaling in lung AECII contributes to eradicating viral  
307 infection in the lungs as well as to controlling neurovirulence of vaccinia virus.

308

309 **Intranasal administration of IFN- $\beta$  rescues mice from lethal WT VACV infection.** We

310 reasoned that if the inability to induce IFN- $\beta$  from lung AECII by WT VACV is the main  
311 contributing factor for its virulence, we should be able to rescue mice from lethal infection with  
312 WT VACV. To test that, we infected 6-8 week old WT C57BL/6J mice with WT VACV at 2 x  
313 10<sup>5</sup> pfu or 2 x 10<sup>6</sup> pfu. They were either treated with intranasal administration of IFN- $\beta$  (1  $\mu$ g per  
314 mouse) or PBS. We monitored weight and survival over time (**Figure S4A**). We found that IFN-  
315  $\beta$  treatment started one day after WT VACV infection at 2 x 10<sup>5</sup> pfu or 2 x 10<sup>6</sup> pfu successfully  
316 slowed down weight loss and protected mice from lethality (**Figure S4B-S4E**). Taken together,  
317 our results indicate that IFN- $\beta$  production and signaling in the lungs are critical for host defense  
318 against vaccinia infection.

319

320 **Intranasal infection of VACV $\Delta$ C7L results in the influx of dendritic cells (DCs), monocytes,  
321 neutrophils, CD8<sup>+</sup>, and CD4<sup>+</sup> T cells into bronchoalveolar space of the infected lungs.** To

322 understand the reduced virulence of VACV $\Delta$ C7L compared with WT VACV in the intranasal

323 infection model, we performed immune cell analyses of bronchoalveolar lavage fluid (BAL) of  
324 WT VACV or VACV $\Delta$ C7L-infected mice. The mice were infected either with VACV at  $2 \times 10^5$   
325 pfu or with VACV $\Delta$ C7L at  $2 \times 10^7$  pfu, or mock-infected with PBS. BAL was collected at 3 and  
326 6 days post infection or PBS treatment. We chose to infect the mice at a lower pfu of WT VACV  
327 because of its high virulence in the intranasal infection model. We observed that Siglec F<sup>+</sup>CD11c<sup>+</sup>  
328 lung resident AMs comprise the majority of CD45<sup>+</sup> cells in the BAL in the PBS mock-infected  
329 mice. WT VACV infection resulted in the reduction of the absolute number of Siglec F<sup>+</sup>CD11c<sup>+</sup>  
330 macrophages at day 6 post infection, with a mild increase of other myeloid cell populations in the  
331 BAL compared with mock-infected controls (**Figures 5A-5D; Figure S5A-S5D**). By contrast,  
332 VACV $\Delta$ C7L infection caused a large influx of CD45<sup>+</sup> myeloid cells, which included  
333 Ly6C<sup>+</sup>CD11b<sup>+</sup> inflammatory monocytes, Ly6G<sup>+</sup> neutrophils, and MHCII<sup>+</sup>CD11c<sup>+</sup> DCs, into  
334 bronchoalveolar space at day 6 post infection (**Figures 5A-5D; Figure S5A-S5D**). DCs are  
335 important for presenting viral antigens to naïve T cells to generate antiviral T cells in the draining  
336 lymph nodes. The increased recruitment of DCs into the alveolar space positively correlates with  
337 the increased CD4<sup>+</sup> and CD8<sup>+</sup> T cells in the BAL at day 6 after VACV $\Delta$ C7L infection (**Figures**  
338 **5E-5G**). We assessed viral-specific CD8<sup>+</sup> T cells responses by stimulating them with vaccinia  
339 dominant B8 epitope TSYKFESV and performing intracellular IFN- $\gamma$  cytokine staining.  
340 SIINFEKL peptide, an irrelevant epitope from chicken ovalbumin, was used as a negative control.  
341 We found that VACV $\Delta$ C7L infection resulted in the extravasation of viral-specific CD8<sup>+</sup> T cells  
342 into the BAL (**Figures 5H-5I**). Taken together, these results indicate that VACV $\Delta$ C7L infection  
343 leads to the recruitment of dendritic cells, monocytes, neutrophils, CD8<sup>+</sup>, and CD4<sup>+</sup> T cells into  
344 the bronchoalveolar space of the infected lungs, whereas WT VACV infection has only a mild  
345 effect.

346

347 **Intranasal infection of VACV $\Delta$ C7L generates more viral-specific activated CD8<sup>+</sup> T cells in**  
348 **the infected lungs compared with WT VACV.** We analyzed CD8<sup>+</sup> T cells in lungs at day 5 post  
349 infection with either WT VACV or VACV $\Delta$ C7L. While WT VACV infection had a limited effect  
350 on the percentages of CD8<sup>+</sup> T cells out of CD45<sup>+</sup> cells in the lungs, VACV $\Delta$ C7L infection strongly  
351 boosted CD8<sup>+</sup> T cells infiltration into lungs (**Figures 5J and 5L**). We also found that VACV $\Delta$ C7L  
352 infection resulted in higher percentages of vaccinia B8-specific CD8<sup>+</sup> T cells in lungs compared  
353 with WT VACV (**Figures 5K and 5M**). These results suggest that host innate immunity, including

354 type I IFN induced by VACV $\Delta$ C7L might facilitate the generation of viral-specific CD8<sup>+</sup> T cell  
355 responses.

356

357 **T, B, NK, and alveolar macrophages are dispensible for host restriction of VACV $\Delta$ C7L**  
358 **infection in an intranasal infection model.** VACV $\Delta$ C7L infection at  $2 \times 10^7$  pfu in RAG1-  
359 deficient mice, which lack T and B cells, resulted in only mild weight loss, and all of the mice  
360 recovered their weight around day 10 and 11 post infection and survived (**Figures 6A-6B**).  
361 Antibody depletion of NK cells did not affect VACV $\Delta$ C7L-induced weight loss and did not  
362 enhance mortality (**Figures 6C-6D**). Furthermore, intranasal application of liposomal clodronate  
363 resulted in depletion of alveolar macrophages, However, this treatment did not exacerbate  
364 VACV $\Delta$ C7L-induced weight loss. These results indicate that T, B, NK, and alveolar macrophages  
365 are not important for controlling VACV $\Delta$ C7L pulmonary infection in this intranasal infection  
366 model.

367

368 **CCR2<sup>+</sup> inflammatory monocytes contribute to host restriction of VACV $\Delta$ C7L infection in**  
369 **the lungs.** Our immune cell profiling of BAL showed that Ly6C<sup>+</sup>CD11b<sup>+</sup> inflammatory monocytes  
370 are the major myeloid cell population extravasated into the BAL at day 3 and 6 post VACV $\Delta$ C7L  
371 infection (**Figures 5B and S3B**). To examine the function of CCR2<sup>+</sup>Ly6C<sup>hi</sup> inflammatory  
372 monocytes in host defense against VACV $\Delta$ C7L infection, we used CCR2-DTR mice to transiently  
373 deplete CCR2<sup>+</sup> monocytes prior to VACV $\Delta$ C7L infection by administering diphtheria toxin (DT)  
374 intraperitoneally (Hohl et al., 2009). We found that CCR2-DTR mice treated with DT were much  
375 more susceptible to VACV $\Delta$ C7L infection compared with WT mice treated with DT, with more  
376 rapid weight loss and 100% mortality at day 7 or 8 post infection (**Figures 6E-6F**). We determined  
377 viral titers in various organs of the mice that were euthanized because of their loss of more than  
378 30% of original weight. We found that depletion of CCR2<sup>+</sup> monocytes resulted in viremia and  
379 systemic dissemination. These results demonstrate that CCR2<sup>+</sup> inflammatory monocytes play an  
380 important role in controlling vaccinia infection in the lungs and in preventing systemic  
381 dissemination.

382

383 **CCR2<sup>+</sup> inflammatory monocytes differentiate into interstitial macrophages (IMs), DCs in the**  
384 **lungs upon VACV $\Delta$ C7L infection.** To track the CCR2<sup>+</sup> monocytes after intranasal viral infection,

385 we used CCR2-GFP reporter mice in which enhanced GFP is expressed in CCR2<sup>+</sup> cells under the  
386 control of CCR2 promoter (Hohl et al., 2009). Intranasal infection of WT mice with VACVΔC7L  
387 leads to a marked increase of GFP<sup>+</sup> Ly6C<sup>+</sup> inflammatory monocytes, IMs (especially Lyve1<sup>-</sup> IMs),  
388 and a modest increase of CD11c<sup>+</sup> DCs in the infected lungs at 3 days post infection (**Figure 7A**).  
389 Using single-cell RNA sequencing analysis, it has been recently shown that CCR2<sup>+</sup>Ly6C<sup>+</sup>  
390 monocytes can differentiate into two distinct IM populations, Lyve1<sup>lo</sup>MHCII<sup>hi</sup> and  
391 Lyve1<sup>hi</sup>MHCII<sup>lo</sup>, in the lungs (Chakarov et al., 2019). Whether the two IM populations have distinct  
392 roles in antiviral activities need to be explored in future studies. Taken together, our results indicate  
393 that intranasal infection of VACVΔC7L leads to the recruitment of CCR2<sup>+</sup> monocytes into the  
394 lungs, which can further differentiate into IMs and DCs under the influence of an inflammatory  
395 milieu in the infected lungs.

396 The MDA5<sup>-/-</sup>STING<sup>Gt/Gt</sup> mice are highly susceptible to VACVΔC7L infection (**Figures 1G, 1H**  
397 **and 1J**). The lung AECIIs from MDA5<sup>-/-</sup>STING<sup>Gt/Gt</sup> mice fail to induce the expression of IFNB  
398 and inflammatory cytokine and chemokine genes upon VACVΔC7L infection (**Figures 2H and**  
399 **2I**). We hypothesized that the lack of induction of innate immunity in the lung epithelium of  
400 MDA5<sup>-/-</sup>STING<sup>Gt/Gt</sup> mice would result in the failure of recruiting CCR2<sup>+</sup> monocytes. To test that,  
401 we performed intranasal infection of VACVΔC7L in WT and MDA5<sup>-/-</sup>STING<sup>Gt/Gt</sup> mice. PBS was  
402 used as a mock infection control in WT mice. Lungs were collected at day 3 post infection and  
403 we analyzed myeloid cell populations. We found that intranasal infection of VACVΔC7L  
404 resulted in the recruitment of Ly6C<sup>+</sup> inflammatory monocytes, and the generation of Lyve1<sup>+</sup> and  
405 Lyve1<sup>-</sup> IMs in WT mice (**Figures 7B-7D**). However, VACVΔC7L induced monocytes and  
406 Lyve1<sup>-</sup> IMs were markedly reduced in MDA5<sup>-/-</sup>STING<sup>Gt/Gt</sup> mice (**Figures 7B-7D**). This indicates  
407 that innate immunity mediated by the cytosolic DNA and dsRNA-sensing pathways most likely  
408 in the lung AECs is critical for the recruitment of CCR2<sup>+</sup> monocytes into the lungs as well as  
409 their differentiation into Lyve1<sup>-</sup> IMs.



## 410 DISCUSSION

411

412 In this study, we established an acute pulmonary DNA virus infection model with an attenuated  
413 but replication-competent mutant VACV with the deletion of a host range protein encoded by the  
414 C7L gene (VACV $\Delta$ C7L). WT VACV is virulent in C57BL/6J mice. The LD<sub>50</sub> is around  $2 \times 10^5$   
415 pfu given intranasally. By contrast, VACV $\Delta$ C7L is non-virulent given at  $2 \times 10^7$  pfu. Using genetic  
416 knock-out mice, or antibody or chemical depletion methods, we demonstrated that T, B, NK, and  
417 alveolar macrophages are dispensable in this acute viral infection model. On the contrary, the  
418 innate immune system consisting of lung AECII and CCR2<sup>+</sup> monocytes play important roles  
419 combating against acute high-dose infection with this replicative DNA virus. Our results also  
420 demonstrate that both the cytosolic dsRNA-sensing pathway mediated by MDA5 and the cytosolic  
421 DNA-sensing pathway mediated by cGAS/STING play important roles in host defense against  
422 VACV $\Delta$ C7L infection. Our results support a model in which VACV $\Delta$ C7L infection triggers IFN-  
423  $\beta$  and CCL2 production from lung AECII, which strengthens an antiviral state through activating  
424 the IFN- $\beta$ /IFNAR/STAT2 pathway, as well as recruiting CCR2<sup>+</sup> inflammatory monocytes through  
425 the CCL2/CCR2 axis. In the infected lungs and under the influence of various cytokines and  
426 chemokines, CCR2<sup>+</sup> inflammatory monocytes then further differentiate into interstitial  
427 macrophages and dendritic cells to fortify host immunity.

428

429 Vaccinia virus encodes many immunomodulatory genes to evade the host immune system (Brady  
430 and Bowie, 2014; Seet et al., 2003). In this study, we focused on the host-range protein C7 and its  
431 inhibitory effect on IFN production. Vaccinia C7 was discovered as a host range protein that allows  
432 vaccinia replication in human cells (Perkus et al., 1990). It is functionally equivalent to another  
433 vaccinia host range protein K1 and therefore deletion of both C7L and K1L gene from the vaccinia  
434 genome renders the virus replication-incompetent in certain human cells (Perkus et al., 1990). One  
435 of the myxoma homologs of C7 encoded by the M62R has been shown to interact with host factor  
436 SAMD9 protein in human cells (Liu et al., 2011). Through an unbiased genome-wide siRNA  
437 screen in human cells, SAMD9 and WDR6 were identified as host restriction factors for vaccinia  
438 virus lacking both the C7L and K1L genes (Sivan et al., 2015). C7 can also bind to SAMD9L in  
439 mouse, and VACV with both C7L and K1L deletion is highly attenuated in an intranasal infection  
440 model, but it gains virulence in SAMD9L<sup>-/-</sup> mice (Meng et al., 2018). The human SAMD9 and

441 murine SAMD9L genes are ISGs (Meng et al., 2018; Tanaka et al., 2010). Through screening a  
442 library of more than 350 human ISGs, overexpression of transcription factor IRF1 was identified  
443 to be able to suppress the replication of mutant vaccinia with deletions of C7L and K1L (Meng et  
444 al., 2012). However, VACV $\Delta$ C7L or VACV $\Delta$ K1L replication was insensitive to IRF1  
445 overexpression, suggesting that both C7 and K1 antagonize IRF1-mediated inhibitory effects  
446 (Meng et al., 2012).

447

448 Using a dual-luciferase reporter assay, we found that overexpression of C7 attenuates STING-,  
449 TBK-, TRIF, MAVS-, TLR3/poly (I:C) and IRF3-induced IFNB promoter activation in HEK293-  
450 T cells. Co-immunoprecipitation studies revealed that C7 interacts with IRF3. Although neither  
451 WT VACV nor VACV $\Delta$ C7L infection of myeloid cells including AMs and BMDCs induces IFNB  
452 gene expression or IFN- $\beta$  protein production, MVA $\Delta$ C7L infection of BMDCs induces higher  
453 levels of IFNB gene expression and IFN- $\beta$  secretion compared with MVA. Furthermore,  
454 MVA $\Delta$ C7L infection induces higher levels of phosphorylation of IRF3 compared with MVA,  
455 indicating that C7 might prevent IRF3 phosphorylation.

456

457 More strikingly, VACV $\Delta$ C7L is attenuated by more than 100-fold compared with WT VACV in  
458 WT C57BL/6J mice in an intranasal infection model. We attribute the attenuation of VACV $\Delta$ C7L  
459 to the following key factors: (i) VACV $\Delta$ C7L infection of murine primary lung alveolar epithelial  
460 cells results in the induction of *Ifnb* and ISG gene expression in a MDA5/STING-dependent  
461 manner; (ii) intranasal infection of VACV $\Delta$ C7L leads to the recruitment of DCs, monocytes,  
462 neutrophils, CD8<sup>+</sup>, and CD4<sup>+</sup> T cells into the BAL and lung parenchyma; and (iii) intranasal  
463 infection of VACV $\Delta$ C7L leads to the recruitment of CCR2<sup>+</sup> inflammatory monocytes into the lung  
464 parenchyma and their differentiation into interstitial macrophages. These results established that  
465 the host range factor vaccinia C7 is a key virulence factor and VACV $\Delta$ C7L infection triggers  
466 innate immunity in the lungs that results in restriction of viral replication and spread.

467

468 Murine lung epithelial cells and alveolar macrophages provide the front-line defense against  
469 invading viral pathogens during pulmonary infection. In the lower respiratory tract, the murine  
470 lung epithelial cell lining is comprised of two main cell types, type I and type II alveolar epithelial  
471 cells (AECIs and AECIIs). AECIIs have been shown to be the major targets of influenza virus

472 infection and contribute to the innate immune defense against viral pathogens both in vitro and in  
473 vivo (Galani et al., 2017; Stegemann-Koniszewski et al., 2016; Weinheimer et al., 2012; Yu et al.,  
474 2011). It was recently shown that AECIIs sorted from the lungs of mice infected with influenza  
475 virus (IAV) up-regulate the expression of many antiviral factors and immune mediators. This  
476 correlates with the ability of the virus to recruit immune cells into the BAL of the infected lungs  
477 (Stegemann-Koniszewski et al., 2016).

478  
479 The role of lung AECIIs in host defense against VACV infection has not been demonstrated  
480 previously. In this study, we isolated lung AECIIs by using an anti-EpCAM antibody and then  
481 cultured these cells in the presence of keratinocyte growth factor on matrigel-coated plates. We  
482 found that VACV $\Delta$ C7L infection of AECIIs induces the expression of *Ifnb* and ISGs, whereas WT  
483 VACV fails to do so. Using lung AECII isolated from MDA5 and STING-double deficient mice,  
484 we found that VACV $\Delta$ C7L-induced *Ifnb* and ISG gene expression is dependent on the cytosolic  
485 nucleic acid-sensing pathways.

486  
487 Alveolar macrophages (AMs) have been shown to play some roles in host defense against vaccinia  
488 infection by using *Csf2*<sup>-/-</sup> mice, which lack AMs, or by using liposomal clodronate to delete AMs,  
489 when the mice were infected at 10<sup>4</sup> to 10<sup>5</sup> pfu (Rivera et al., 2007; Schneider et al., 2014). The  
490 protective roles of AMs were also observed with intratracheal infection with PR8 influenza virus  
491 (Schneider et al., 2014). It has been postulated that AMs play a protective role in the lungs by  
492 removing dead cells and eosinophilic surfactant material aggravated by viral infection. In this  
493 study, depletion of AMs by liposomal clodronate did not affect the weight loss or mortality induced  
494 by intranasal infection of VACV $\Delta$ C7L at 2 x 10<sup>7</sup> pfu. We also observed that neither VACV $\Delta$ C7L  
495 nor WT VACV infection of AMs induces IFN or proinflammatory cytokine/chemokine  
496 production. Therefore, unlike lung AECIIs, AMs do not seem to be important in host defense  
497 against VACV $\Delta$ C7L intranasal infection in WT mice.

498  
499 To understand which cell population(s) are the major producer(s) of IFN- $\beta$  after intranasal  
500 infection with VACV $\Delta$ C7L, we used IFN $\beta$ -yellow fluorescent protein (YFP) knockin mice to map  
501 the IFN- $\beta$  producing cells in the lungs after VACV $\Delta$ C7L infection (Scheu et al., 2008). FACS  
502 results show that the majority of YFP<sup>+</sup> cells in the lungs at 1 day post VACV $\Delta$ C7L intranasal

503 infection are CD45<sup>+</sup>CD31<sup>-</sup>T1a<sup>-</sup>EpCAM<sup>+</sup>, which are consistent with lung AECIIs.  
504 Immunohistochemistry (IHC) of lungs collected at 1 day post VACVΔC7L infection showed that  
505 among the AECII cells, which are positive for surfactant protein C (SPC), some are also positive  
506 for IFNβ-YFP as detected by anti-GFP antibody. These results are congruent with our *in vitro*  
507 results that VACVΔC7L infection of purified lung AECs induces IFNB gene expression and IFN-  
508 β protein secretion.

509

510 The type I IFN receptor and JAK/STAT pathway are critical for host resistance to viral infection.  
511 The IFNAR1-deficient mice are more susceptible to WT VACV infection compared with WT mice  
512 (Muller et al., 1994; van den Broek et al., 1995). Because STAT2 acts downstream of IFNAR1, it  
513 is expected that STAT2<sup>-/-</sup> mice may also be more susceptible to vaccinia infection. The difference  
514 of virulence of VACVΔC7L in WT and STAT2<sup>-/-</sup> or IFNAR1<sup>-/-</sup> mice is striking. Whereas  
515 VACVΔC7L at 2 x 10<sup>7</sup> pfu causes only transient weight loss but no lethality in WT mice, its LD50  
516 in STAT2<sup>-/-</sup> or IFNAR1<sup>-/-</sup> mice is around 1000 pfu.

517

518 Our bone marrow chimera results indicate that the type I IFN feedback loop in the non-  
519 hematopoietic cell population(s) is most important for mice survival after VACVΔC7L intranasal  
520 infection, although IFNAR1 signaling in hematopoietic cell population(s) also contributes to host  
521 defense. Using mice with specific deletion of *Ifnar1* in lung AECIIs (*Ifnar1*<sup>fl/fl</sup>-*Sftpc*<sup>cre-ERT2</sup>), we  
522 found that type I IFN signaling on lung AECII is critical for host defense against VACVΔC7L  
523 intranasal infection. Taken together, these results demonstrate that lung AECIIs produce IFN-β in  
524 response to VACVΔC7L infection, which in turn directly stimulates IFNAR1 on AECIIs to restrict  
525 viral replication and spread. In addition, they produce chemokines to recruit hematopoietic innate  
526 immune cells to the infected tissue for boosting antiviral immunity.

527 Monocytes egress from the bone marrow to the blood circulation in response to infection and  
528 they also migrate to the infected or inflamed tissue in a CCR2-dependent manner where they  
529 further differentiate into other cell types, including inflammatory DCs and macrophages. CCR2<sup>+</sup>  
530 monocytes have been shown to be important for antiviral immunity in a mouse model of  
531 intravaginal infection with herpes simplex virus 2 (HSV-2). CCR2<sup>-/-</sup> mice are more susceptible to  
532 HSV-2 infection with worsening clinical symptoms, increased mortality, and higher viral titers in

533 vaginal wash (Iijima et al., 2011). By contrast, in an intranasal infection model of influenza  
534 virus, CCR2<sup>+</sup> monocytes contribute to the influenza-induced lung immunopathology and death  
535 (Lin et al., 2008). To address the role of CCR2<sup>+</sup> monocytes in host defense against intranasal  
536 infection with VACVΔC7L, we used CCR2-DTR mice, in which CCR2<sup>+</sup> monocytes can be  
537 transiently depleted by intraperitoneal delivery of diphtheria toxin (DT) (Hohl et al., 2009). We  
538 found that depletion of CCR2<sup>+</sup> inflammatory monocytes renders the mice susceptible to  
539 VACVΔC7L infection. All of the infected CCR2-DTR mice died after DT treatment with  
540 viremia and systemic dissemination of the virus. To understand the role of CCR2<sup>+</sup> monocytes in  
541 host defense against vaccinia infection, we used CCR2-GFP reporter mice to track the CCR2<sup>+</sup>  
542 monocytes after intranasal infection with VACVΔC7L. Our results show that VACVΔC7L  
543 infection in WT mice causes the recruitment of CCR2<sup>+</sup> monocytes into the infected lungs and  
544 their differentiation into Lyve1<sup>+</sup> IMs. These effects were lost in VACVΔC7L-infected MDA5<sup>-/-</sup>  
545 STING<sup>Gt/Gt</sup> mice.

546 In conclusion, using an attenuated vaccinia virus (VACVΔC7L), we established an intranasal  
547 DNA virus infection model in which adaptive immunity is dispensable for host defense against  
548 acute infection. This allows us to focus on host innate immunity in restricting viral infection in  
549 the lungs. Our results highlight the cross-talk between lung AECs with CCR2<sup>+</sup> monocytes in the  
550 control of acute pulmonary viral infection.

551 **ACKNOWLEDGEMENTS**

552

553 We thank the Flow Cytometry Core Facility and Molecular Cytology Core Facility at the Sloan  
554 Kettering Institute. We thank Stewart Shuman, Eric Pamer, Jedd Wolchok, and Taha Merghoub  
555 for helpful discussions. We thank Joan Libermann-Smith for editing. This work was supported  
556 that NIH grant K-08 AI073736 (L.D.), R56AI095692 (L.D.), Lucille Castori Center for Microbes,  
557 Inflammation & Cancer seed grant (L.D.), the Society of Memorial Sloan Kettering (MSK)  
558 research grant (L.D.), MSK Technology Development Fund (L.D.), Sponsored Research Award  
559 from IMVAQ Therapeutics. LD is the recipient of a Physician Scientist Career Development  
560 Award from the Dermatology Foundation, a research scholar from American Skin Association.  
561 She is the recipient of a career development award from Parker Institute for Cancer  
562 Immunotherapy. This research was also funded in part through the NIH/NCI Cancer Center  
563 Support Grant P30 CA008748.

564

565 **AUTHOR CONTRIBUTIONS**

566 Author contributions: L.D. and N.Y. designed and performed the experiments, analyzed the data,  
567 and prepared the manuscript. P.D. and Y.W. assisted in some experiments, analyzed the data. J.L.  
568 assisted in some experiments, analyzed the data, and assisted in manuscript preparation. C.M.R.  
569 assisted in experimental design, data interpretation, and manuscript preparation. Memorial Sloan  
570 Kettering Cancer Center filed a patent application for the use of recombinant MVA $\Delta$ C7L or  
571 VACV $\Delta$ C7L as monotherapy or in combination with immune checkpoint blockade for solid  
572 tumors and vaccine applications.

573

574 **DECLARATION OF INTERESTS**

575 Memorial Sloan Kettering Cancer Center filed a patent application for the use of recombinant  
576 MVA $\Delta$ C7L or VACV $\Delta$ C7L as monotherapy or in combination with immune checkpoint blockade  
577 for solid tumors and vaccine applications. L.D. and Y.N. are co-founders of IMVAQ Therapeutics  
578 and C.M.R. is on the scientific advisory board of IMVAQ.

579

580

581

582

583

## 584 **Materials and Methods**

### 585 *Mice*

586 Female C57BL/6J mice between 6 and 8 weeks of age were purchased from the Jackson  
587 Laboratory and were used for the preparation of bone marrow-derived dendritic cells and for  
588 intranasal infection experiments. IFN $\beta$ /YFP reporter mouse, cGAS<sup>-/-</sup>, STAT2<sup>-/-</sup>, IFNAR1<sup>-/-</sup>, Sftpc-  
589 CreER<sup>T2</sup>, Ifnar<sup>fl</sup>, mice were purchased from the Jackson Laboratory. STING<sup>Gt/Gt</sup> mice were  
590 generated in the laboratory of Russell Vance (University of California, Berkeley). MDA5<sup>-/-</sup> mice  
591 were generated in Marco Colonna's laboratory (Washington University). MDA5<sup>-/-</sup>STING<sup>Gt/Gt</sup> and  
592 Ifnar1<sup>fl/fl</sup>-Sftpc<sup>cre-ERT2</sup> mice were bred in our lab. CCR2-GFP and CCR2-DTR mice were  
593 provided by Eric Pamer (Memorial Sloan Kettering Cancer Center). These mice were maintained  
594 in the animal facility at the Sloan Kettering Institute. All procedures were performed in strict  
595 accordance with the recommendations in the Guide for the Care and Use of Laboratory Animals  
596 of the National Institute of Health. The protocol was approved by the Committee on the Ethics of  
597 Animal Experiments of Sloan-Kettering Cancer Institute.

598

### 599 *Intranasal infection of WT VACV or VACV $\Delta$ C7L in mice.*

600 5-10 WT mice in each group were anesthetized and infected intranasally with increasing doses of  
601 WT VACV or VACV $\Delta$ C7L at indicated pfu, inoculated to both nostrils in 20  $\mu$ l each. Mice were  
602 monitored and weight daily. Mice that had lost over 30% of initial weight were be euthanized.  
603 Kaplan-Meier survival curves were determined.

604

### 605 *Cytokine production assays*

606 For in vivo experiments, 1 ml of bronchoalveolar lavage was used for cytokine measurements. For  
607 in vitro experiments, cell supernatant was collected for analysis. Most cytokines were measured  
608 using commercial mouse ELISA kits. IFN- $\beta$  was measured by ELISA (PDL) and CCL4 and CCL5  
609 were measured by ELISA (R&D). The Luminex assay was performed using the Cytokine Mouse  
610 Magnetic 20-Plex Panel (ThermoFisher).

611

### 612 *Flow cytometry*

613 To analyze cell populations in the BALF and lung, lungs were digested with Collagenase D

614 (2mg/ml) and DNase I (100 µg/ml) for 45 mins at 37°C. Single Cell suspensions were blocked  
615 Anti-CD16/CD32 antibody and stained with antibodies for 30 mins on ice. LIVE/DEAD™ Fixable  
616 Aqua Stain (ThermoFisher) was used to stain dead cells. Fluorescently conjugated antibodies,  
617 including anti-CD45.2 (clone 104), anti-Ly6G (clone 1A8), anti-Ly6C (clone HK1.4), anti-CD11c  
618 (clone N418), anti-CD11b (clone M1/70), anti-MHC II (clone M5/114.15.2), anti-CD31 (clone  
619 MEC13.3), anti-EpCAM (clone G8.8), anti-CD104 (clone 346-11A), anti-CD64 (clone X54-5/7.1)  
620 anti-CD3ε (clone 145-2C11), anti-CD4 (clone RM4-5), anti-CD8 (clone 53-6.7) and anti-IFN-γ  
621 (clone XMG1.2) were from BioLegend. Anti-CD45 (clone 30-F11), anti-Siglec F (clone E50-  
622 2440) were from BD biosciences. Anti-MERTK (clone DS5MMER) was from ThermoFisher. For  
623 intracellular cytokine staining, cell suspensions were incubated with 5 µg/ml peptide (B8R 20-27  
624 or OVA 257-264) and Brefeldin A (0.1%) for 4 hours at 37°C prior to all staining, treated with BD  
625 Cytofix/Cytoperm™ kit for staining. Cells were analyzed on the BD LSR II flow cytometer. Data  
626 were analyzed with FlowJo software (version 10.5.3).

627

#### 628 *Tissue fixation and immunostaining*

629 Lungs were fixed with 4% paraformaldehyde for overnight at 4°C. Lungs were embedded in O.C.T  
630 and cryosections (10 µm) were used for immunofluorescent (IF) analysis. Tissue sections were  
631 permeabilized with 0.5% Triton X-100 in PBS for 5 min. Then blocked in 5% goat serum (Sigma),  
632 3% bovine serum albumin (Fisher) and 0.1% Triton X-100 for 1 hr at room temperature. Primary  
633 antibodies were incubated overnight at 4°C at the indicated dilutions: chicken anti-GFP (1:1000,  
634 Abcam), rabbit anti-SP-C (1:1000, Millipore). Alexa Fluor-coupled secondary antibodies (1:1000,  
635 Invitrogen) were incubated at room temperature for 60 min. After antibody staining, sections were  
636 embedded in ProLong Gold Antifade Mountant (ThermoFisher). Images were acquired using a  
637 confocal microscope (Leica TCS SP8). All the images were further processed with Image J  
638 software.

639

#### 640 *Tamoxifen and Diphtheria Toxin Administration*

641 Diphtheria toxin was obtained from Sigma, reconstituted at 1 mg/ml in PBS, and frozen at -80°C.  
642 Mice received 10 ng/g DT via the i.p. route in 0.2–0.3 ml PBS. Tamoxifen (Sigma) was a 40 mg/ml  
643 stock solution in corn oil (Sigma) and given 4 mg via intraperitoneal (IP) injection x 4-5 doses.

644



645 *Viruses and Cell lines*

646 The WR strain of vaccinia virus (VACV) was propagated and virus titers were determined on  
647 BSC40 (African green monkey kidney cells) monolayers at 37°C. MVA virus was kindly provided  
648 by Gerd Sutter (University of Munich), and propagated in BHK-21 (baby hamster kidney cell,  
649 ATCC CCL-10) cells. The viruses were purified through a 36% sucrose cushion. Heat-iMVA was  
650 generated by incubating purified MVA virus at 55 °C for 1 hour. Sendai virus (SeV; Cantell strain)  
651 was obtained from Charles River Laboratories. BSC40, HEK293T and RAW264.7 were cultured  
652 in Dulbecco's modified Eagle's medium supplemented with 10% fetal bovine serum (FBS), 2 mM  
653 L-glutamine and 1% penicillin-streptomycin. BHK-21 were cultured in Eagle's Minimal Essential  
654 Medium (Eagle's MEM, can be purchased from Life Technologies, Cat# 11095-080) containing  
655 10% FBS, and 1% penicillin-streptomycin. For THP-1 differentiation into macrophages, they were  
656 treated with PMA (10 ng/ml) for 72 h.

657

658 To culture primary murine AEC2, the lungs from mice (6-8 weeks) were perfused via the right  
659 ventricle with 10 ml PBS, then inflated with a 1.5 ml mixture of 1 ml low melting agarose (1%  
660 w/v) and 500 µl dispase (Corning). The lung lobes were gently minced into small pieces in a  
661 conical tube containing 3ml of PBS, 1U/mL of dispase (Roche), and 100U/ml DNase I (Sigma)  
662 followed by rotating incubation for 45 min at 37°C. The cells were filtered through 40 µm mesh  
663 and for further staining against antibodies for mouse flow cytometry: pan CD45-APC, CD31-APC,  
664 FITC-CD104 and EpCAM-APC-Cy7 (BioLegend). LIVE/DEAD™ Fixable Aqua Stain  
665 (ThermoFisher) was used to eliminate dead cells. Cell sorting was performed with a FACS Aria II  
666 (BD Biosciences), and data were analyzed with FlowJo software (Tree Star, Inc.). AECII  
667 progenitors cells were plated into a Matrigel (Corning, 354230) pre-coated TC plate and cultured  
668 with Small Airway Epithelial Cell Growth Medium (Lonza) supplemented with charcoal-stripped  
669 5% FBS, 10 ng/ml keratinocyte growth factor (PeproTech, 100-19), 10 µM Rock inhibitor (Selleck  
670 Chemicals, S1049), and 1% P/S at 37°C in a 5% CO2 incubator for the first 2 days, and then  
671 replaced with the same media but without Rock inhibitor for the next 4 to 5 days.

672

673 *Multistep growth curve of WT VACV and VACVΔC7L*

674 AEC2 cells were infected with WT VACV or VACVΔC7L at a MOI of 0.05. The cells were then  
675 scraped into the medium and collected at indicated times. After three cycles of freeze-thaw and

676 subsequent sonication, viral titers in the collected samples were determined by plaque assay on  
677 BSC40 cells.

678

#### 679 *Plasmid Construction*

680 IFN- $\beta$  reporter plasmid (pIFN- $\beta$ -luc) and ISRE reporter plasmid (p-ISRE-luc) were provided by  
681 Michaela Gack (University of Chicago). STING, TBK1, IRF3 were provided by Tom Maniatis  
682 (University of Columbia). IRF3-5D were provided by Rongtuan Lin (McGill University). MAVS,  
683 TLR3, TRIF plasmids were purchased from Addgene. VACV C7L was amplified by PCR from  
684 VACV WR genome and subcloned into pcDNA3.1 and pQCXIP.

685

#### 686 *Dual Luciferase Reporter assay*

687 Luciferase activities were measured using the Dual Luciferase Reporter Assay system according  
688 to the manufacturer's instructions (Promega). Briefly, expression plasmids including a firefly  
689 luciferase reporter construct, a *Renilla* luciferase reporter construct, as well as other expression  
690 constructs were transfected into HEK293T cells. 24 h post transfection, cells were collected and  
691 lysed. The relative luciferase activity was expressed as arbitrary units by normalizing firefly  
692 luciferase activity under IFNB promoter to Renilla luciferase activity from a control plasmid pRL-  
693 TK.

694

#### 695 *Construction of retrovirus expressing vaccinia C7L*

696 HEK293T cells were passaged into 6-well plate. Next day, cells were transfected with three  
697 plasmids- VSVG, gag/pol and pQCXIP-C7 or pQCXIP with lipofectamine 2000. After 2 days, cell  
698 supernatants were collected and filtered through 0.45  $\mu$ m filter and stored in -80  $^{\circ}$ C.

699

#### 700 *Generation of RAW264.7 and THP-1 cell line stably expressing vaccinia C7L*

701 Cells were passaged into 6-well plate. Next day, cells were infected with retrovirus expressing  
702 C7L or control virus at MOI 5. After 2 days, culture medium was replaced with medium containing  
703 puromycin. After one week, survival cells are the cells stably expressing C7L and verified by  
704 Western blot analysis using anti-C7 antibody.

705

#### 706 *Generation of recombinant VACV $\Delta$ C7L virus*

707 BSC40 cells were passaged into 6-well plate. Next day, cells were infected with WT vaccinia virus  
708 WR strain at MOI 0.2. After 1-2 h, cells were transfected with pC7-GFP or pC7-mCherry with  
709 lipofectamine 2000. Both GFP and mCherry expression were under vaccinia synthetic early and  
710 late promoter (pSE/L). After 2 days, cells were collected and underwent three cycles of  
711 freeze/thaw. To select pure recombinant VACV $\Delta$ C7L, BSC40 cells were infected with virus mix  
712 above, then select single plaques based on the GFP or mCherry expression under the microscope.  
713 After several rounds plaque purification, pure recombinant VACV $\Delta$ C7L-GFP and VACV $\Delta$ C7L-  
714 mCherry were obtained. PCR analyses and sequencing were performed to make sure that the C7L  
715 gene was deleted from the VACV genome.

716

#### 717 *Generation of recombinant MVA $\Delta$ C7L virus*

718 BHK21 cells were passaged into 6-well plate. Next day, cells were infected with MVA at MOI  
719 0.2. After 1-2 h, cells were transfected with pC7-GFP with lipofectamine 2000. After 2 days, cells  
720 were collected and underwent three cycles of freeze/thaw. BHK21 cells were infected with virus  
721 stock collected above, then select plaques based on the GFP expression under the microscope.  
722 After several rounds of selection, all plaques were GFP positive. GFP-positive MVA $\Delta$ C7L clones  
723 were amplified and the deletion of the C7L gene was confirmed by PCR analysis.

724

#### 725 *Generation of bone marrow-derived dendritic cells (BMDCs)*

726 The bone marrow cells from the tibia and femur of mice were collected by first removing muscles  
727 from the bones, and then flushing the cells out using 0.5 cc U-100 insulin syringes (Becton  
728 Dickinson) with RPMI with 10% FCS. After centrifugation, cells were re-suspended in ACK  
729 Lysing Buffer (Lonza) for red blood cells lysis by incubating the cells on ice for 1-3 min. Cells  
730 were then collected, re-suspended in fresh medium, and filtered through a 40- $\mu$ m cell strainer (BD  
731 Biosciences). The number of cells was counted. For the generation of GM-CSF-BMDCs, the bone  
732 marrow cells (5 million cells in each 15 cm cell culture dish) were cultured in CM in the presence  
733 of GM-CSF (30 ng/ml, produced by the Monoclonal Antibody Core facility at the Sloan Kettering  
734 Institute) for 10-12 days. CM is RPMI 1640 medium supplemented with 10% fetal bovine serum  
735 (FBS), 100 Units/ml penicillin, 100  $\mu$ g/ml streptomycin, 0.1mM essential and nonessential amino  
736 acids, 2 mM L-glutamine, 1 mM sodium pyruvate, and 10 mM HEPES buffer. Cells were fed  
737 every 2 days with fresh medium.

738 *Western Blot Analysis*

739 BMDCs ( $1 \times 10^6$ ) from WT and KO mice were infected with MVA or MVA $\Delta$ C7L at a MOI  
740 (multiplicity of infection) of 10. Whole-cell lysates were prepared. Equal amounts of proteins were  
741 subjected to sodium dodecyl sulfate-polyacrylamide gel electrophoresis and the polypeptides were  
742 transferred to a nitrocellulose membrane. Phosphorylation of IRF3, and IRF3 were determined  
743 using respective antibodies (Cell Signaling). Anti-C7 antibody was used to determine C7  
744 expression by MVA. Anti-glyceraldehyde-3-phosphate dehydrogenase (GADPH) or anti- $\beta$ -actin  
745 antibodies (Cell Signaling) were used as loading controls.

746

747 *Co-immunoprecipitation*

748 HEK293T cells were passaged into 10 cm plates. Next day, cells were transfected with Flag-IRF3  
749 together with pcDNA3.1-C7. After two days, cells were lysed in Pierce IP lysis buffer on ice for  
750 30 min. C7 antibody was added into cell lysis to final concentration 1  $\mu$ g/ml. Then incubate at 4  
751  $^{\circ}$ C overnight. Next day, protein A-agarose was added and incubate at 4  $^{\circ}$ C for 2 h. Wash agarose  
752 with IP lysis buffer for three times. Lastly, the proteins were denatured at 98  $^{\circ}$ C 5 min before  
753 loading on a SDS-PAGE.

754

755 *Quantitative real-time PCR*

756 Total RNA was obtained from cultured cells with TRIzol reagent (Invitrogen). Cellular RNAs  
757 were reverse-transcribed and amplified by PCR using the Verso cDNA synthesis kit (Thermo  
758 Fisher) and SYBR<sup>TM</sup> Green Master Mix (Thermo Fisher). Cellular RNAs were normalized to  
759 GAPDH levels. All assays were performed on an ABI 7500 system and analyzed with ABI 7500  
760 SDS software v.1.3. The primers used are as follows:

761 mIFNB forward 5'-TGGAGATGACGGAGAAGATG-3',

762 mIFNB reverse 5'-TTGGATGGCAAAGGCAGT-3',

763 mCCL4 forward 5'-GCCCTCTCTCTCCTCTTGCT-3',

764 mCCL4 reverse 5'-CTGGTCTCATAGTAATCCATC-3',

765 mCCL5 forward 5'-GCCACGTCAAGGAGTATTTCTA-3'

766 and mCCL5 reverse 5'-ACACACTTGGCGGTTTCCTTC-3'.

767

768 *Generation of VACV C7 specific polyclonal antibodies*

769 The vaccinia C7L gene was cloned into bacterial expression vector- pET28-SUMO. The C7  
770 expression plasmids were transfected into *E. coli* BL21 (DE3) cells. Cultures (2-liter) from a single  
771 transformant were grown at 37°C in LB Broth containing 100 µg/ml ampicillin until  
772 the  $A_{600}$  reached 0.6. The cultures were adjusted to 0.5 mM isopropyl-β-d-thiogalactopyranoside  
773 (IPTG), and then incubated for 20 h at 18°C with constant shaking. Cells were harvested by  
774 centrifugation and resuspended in buffer A (50 mM Tris-HCl, pH 7.5, 500 mM NaCl, 20 mM  
775 imidazole, 10% glycerol). The cells were lysed by sonication and the insoluble material was  
776 removed by centrifugation at 15,000 rpm for 45 min. The bacterial lysates were mixed for 1 h with  
777 5 ml of Ni-NTA resin (Qiagen) that had been equilibrated with buffer A. The resins were poured  
778 into gravity-flow columns and then washed with 60 ml of buffer A. The adsorbed proteins were  
779 step-eluted with 300 mM imidazole in buffer A. The polypeptide compositions of the eluate  
780 fractions were monitored by SDS-PAGE and the peak fractions containing each recombinant  
781 protein were pooled. The eluates were dialyzed against buffer containing 50 mM Tris-HCl (pH 8),  
782 200 mM NaCl, 2 mM DTT, 2 mM EDTA, 10% glycerol, and 0.1% Triton X-100 and then stored  
783 at -80 °C. Rabbit immunization and generation of anti-C7 polyclonal rabbit antibody was  
784 performed in Pocono Rabbit Farm and Laboratory (PRF&L). The anti-C7 antibodies were purified  
785 from rabbit serum using affinity purification.

786

#### 787 *Bone marrow chimeric mice experiments*

788 Wild-type B6.SJL mice (CD45.1 background) or IFNAR1<sup>-/-</sup> mice (CD45.2 background) were  
789 given a dose of irradiation (1096 Rads). After 6 hours, mice were injected retro-orbitally with  
790 isolated WT or KO bone marrow cells (5 x 10<sup>6</sup> cells per mouse). Antibiotic-containing water (80  
791 mg/L trimethoprim and 400 mg/L sulfamethoxazole) were provided for four weeks after  
792 irradiation. After another 4 weeks, the mice are ready for experiments.

793

#### 794 *Statistics*

795 Two-tailed unpaired Student's t test was used for comparisons of two groups in the studies.  
796 Survival data were analyzed by log-rank (Mantel-Cox) test. The p values deemed significant are  
797 indicated in the figures as follows: \*, p < 0.05; \*\*, p < 0.01; \*\*\*, p < 0.001; \*\*\*\*, p < 0.0001. The  
798 numbers of animals included in the study are discussed in each figure legend.

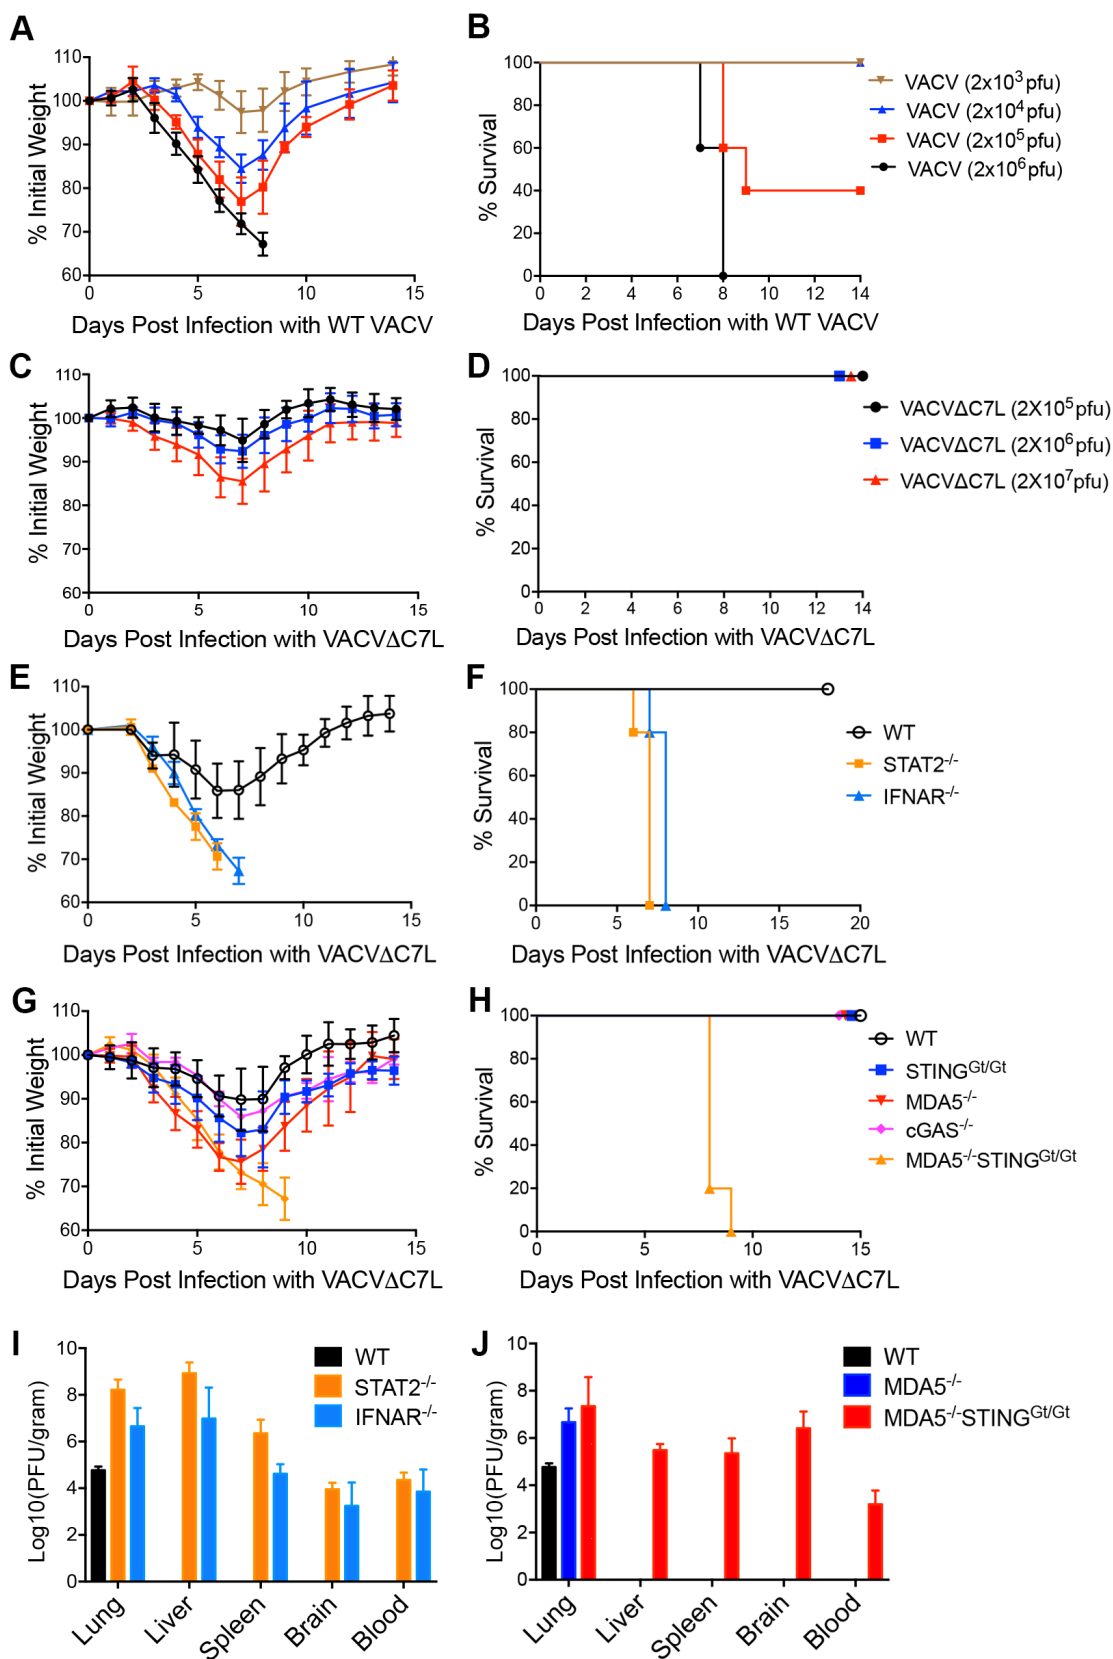

825 **Figure 1. VACV $\Delta$ C7L is highly attenuated in a murine intranasal infection model, but**  
826 **gains virulence in STAT2, IFNAR1-deficient, or MDA5<sup>-/-</sup>-STING<sup>Gt/Gt</sup> mice.**  
827 (A) shown are the percentages of initial weight over days post intranasal infection with WT  
828 VACV at increasing doses.  
829 (B) Kaplan-Meier survival curve of WT C57BL/6J control mice (n=5 in each group) infected  
830 with WT VACV at increasing doses.  
831 (C) shown are percentages of initial weight over days post intranasal infection with VACV $\Delta$ C7L  
832 at increasing doses.  
833 (D) Kaplan-Meier survival curve of WT C57BL/6J control mice infected with VACV $\Delta$ C7L at  
834 increasing doses.  
835 (E) shown are the percentages of initial weight over days post intranasal infection with  
836 VACV $\Delta$ C7L at a dose of  $2 \times 10^7$  pfu in STAT2<sup>-/-</sup>, IFNAR1<sup>-/-</sup>, or age-matched WT C57BL/6J  
837 control mice (n=5 in each group). A representative experiment is shown, repeated once.  
838 (F) Kaplan-Meier survival curve of STAT2<sup>-/-</sup>, IFNAR1<sup>-/-</sup>, or age-matched WT C57BL/6J mice  
839 infected with VACV $\Delta$ C7L (n=5 in each group).  
840 (G) shown are the percentages of initial weight over days post intranasal infection with  
841 VACV $\Delta$ C7L at a dose of  $2 \times 10^7$  pfu in cGAS<sup>-/-</sup>, STING<sup>Gt/Gt</sup>, MDA5<sup>-/-</sup>, MDA5<sup>-/-</sup>-STING<sup>Gt/Gt</sup> or  
842 age-matched WT C57BL/6J control mice (n=5 in each group). A representative experiment is  
843 shown, repeated once.  
844 (H) Kaplan-Meier survival curve of cGAS<sup>-/-</sup>, STING<sup>Gt/Gt</sup>, MDA5<sup>-/-</sup>, MDA5<sup>-/-</sup>-STING<sup>Gt/Gt</sup> or age-  
845 matched WT C57BL/6J control mice infected with VACV $\Delta$ C7L (n=5 in each group).  
846 (I) Titers of VACV $\Delta$ C7L in the lungs, livers, spleens, blood, and brains of STAT2<sup>-/-</sup>, IFNAR1<sup>-/-</sup>,  
847 or age-matched WT C57BL/6J control mice at day 4 post intranasal infection with VACV $\Delta$ C7L  
848 at a dose of  $2 \times 10^7$  pfu. Data are represented as mean  $\pm$  SEM (n=3-5).  
849 (J) Titers of VACV $\Delta$ C7L in the lungs, livers, spleens, blood, and brains of MDA5<sup>-/-</sup>, MDA5<sup>-/-</sup>-  
850 STING<sup>Gt/Gt</sup> or age-matched WT C57BL/6J control mice at day 4 post intranasal infection with  
851 VACV $\Delta$ C7L at a dose of  $2 \times 10^7$  pfu. Data are represented as mean  $\pm$  SEM (n=3-5).

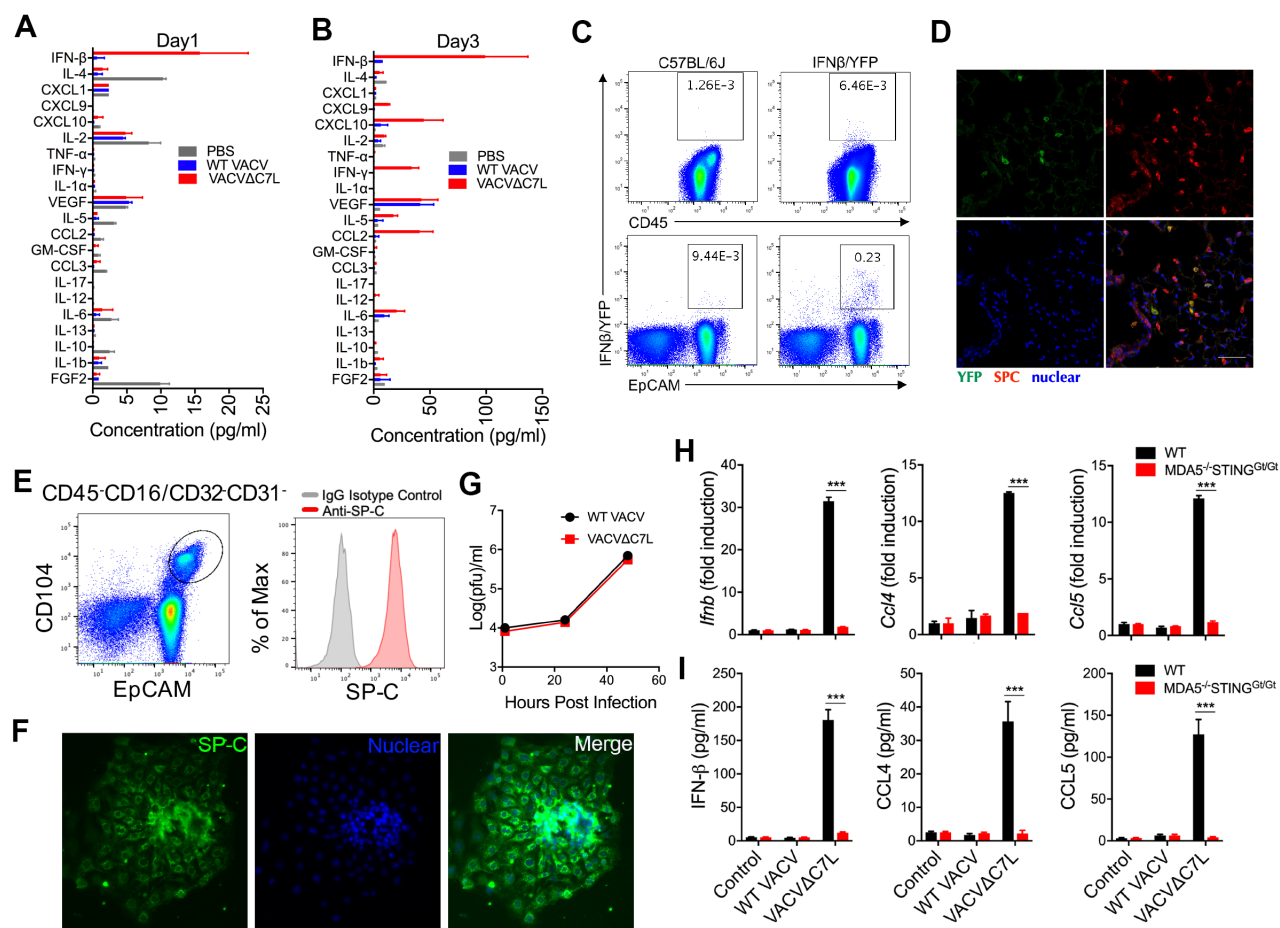



852 **Figure 2. Lung AECIIs produce IFN- $\beta$  and proinflammatory cytokines and chemokines**  
853 **upon VACV $\Delta$ C7L infection in a MDA5/STING-dependent manner.**

854 (A) and (B) Levels of IFN- $\beta$  and other cytokines and chemokines in BAL from VACV $\Delta$ C7L or  
855 WT VACV-infected mice collected at day1 and day 3 post infection determined by ELISA or  
856 Luminex.

857 (C) Dot plots showing percentages of IFN $\beta$ /YFP positive cells among CD45<sup>+</sup> immune cells and  
858 CD45<sup>-</sup>EpCAM<sup>+</sup> lung AECIIs in VACV $\Delta$ C7L-infected lungs from IFN $\beta$ -YFP and WT C57BL/6J  
859 mice determined by FACS.

860 (D) Immunohistology of lung section from IFN $\beta$ -YFP mice infected with VACV $\Delta$ C7L collected  
861 at 1 day post infection. Top left: IFN $\beta$ -YFP<sup>+</sup> cells (green); Top right: surfactant protein C (SPC)  
862 positive AECII (red); Bottom left: DAPI staining of nuclei (blue); Bottom right: overlay of the  
863 three colors showing co-localization of green and red signals demonstrating that lung AECIIs are  
864 IFN- $\beta$  producing cells.

865 (E) Gating strategy for the isolation of lineage negative epithelial progenitor cells that are CD45<sup>-</sup>  
866 CD16/CD32<sup>-</sup>CD31<sup>-</sup>EpCAM<sup>+</sup>CD104<sup>+</sup>. Cells were cultured *in vitro* on Matrigel-coated plates as  
867 described in methods for 4-5 days. The identify of AECII cells were confirmed by SPC<sup>+</sup> staining  
868 determined by FACS.

869 (F) Immunofluorescence staining of SPC of *in vitro* cultured AECII cells.

870 (H) RT-PCR analyses of *Ifnb*, *Ccl4*, and *Ccl5* gene expression of AECII cells from WT or  
871 MDA5<sup>-/-</sup>STING<sup>Gt/Gt</sup> mice infected with either WT VACV or VACV $\Delta$ C7L at a MOI of 10.

872 (I) ELISA analyses of IFN- $\beta$ , CCL4, CCL5 levels in the supernatants of AECII culture from WT  
873 or MDA5<sup>-/-</sup>STING<sup>Gt/Gt</sup> mice infected with either WT VACV or VACV $\Delta$ C7L at a MOI of 10.

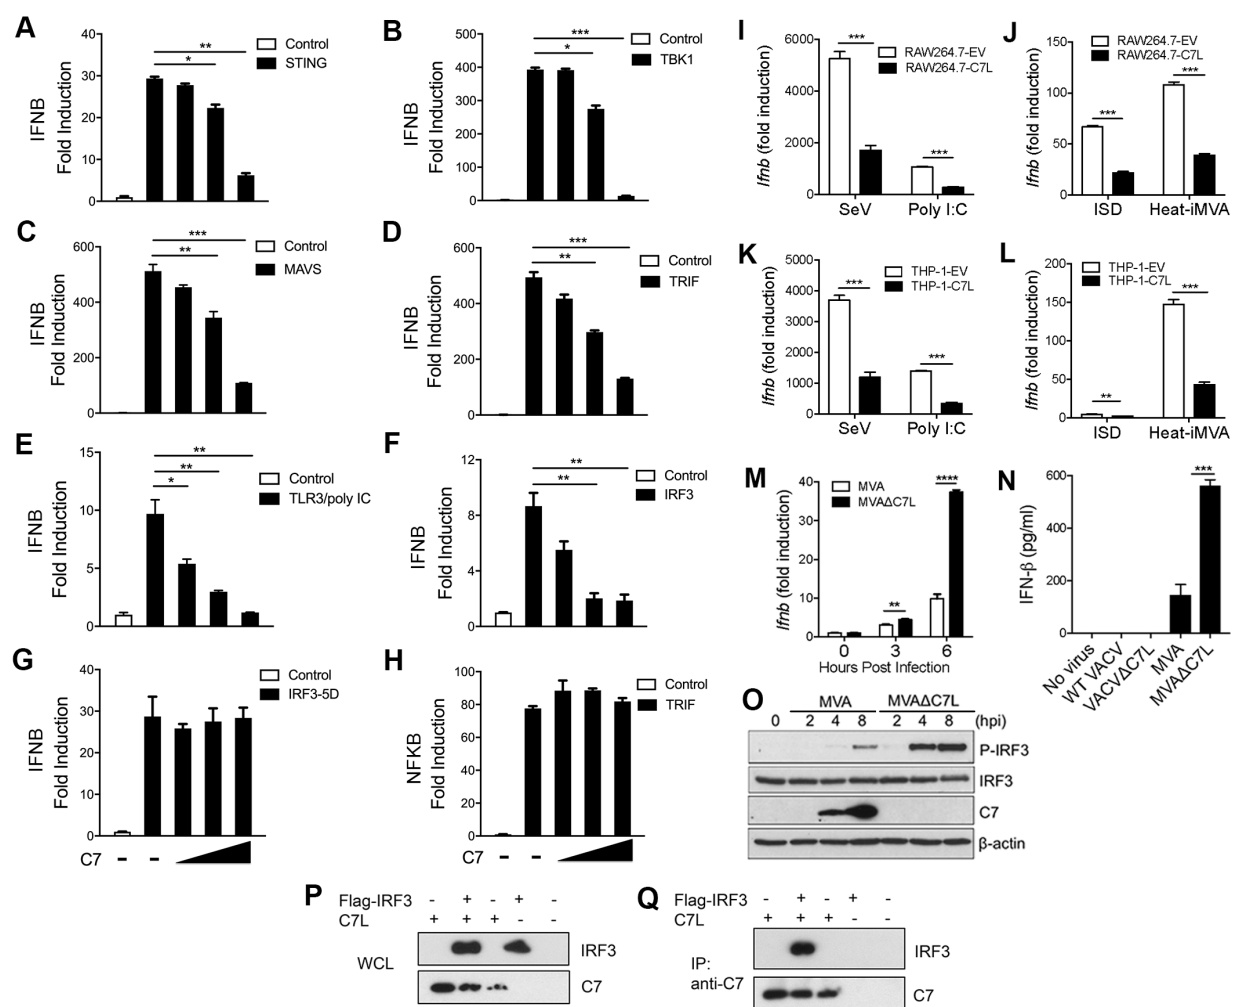

874 **Figure 3. Vaccinia C7 inhibits IFNB gene induction by innate immune pathways by**  
875 **interacting with IRF3 and preventing IRF3 phosphorylation**

876 (A) Dual-luciferase assay of HEK293T cells transfected with IFNB-firefly luciferase reporter, a  
877 control plasmid pRL-TK expressing *Renilla* luciferase, vaccinia C7L-expressing or control  
878 plasmid, and STING-expressing plasmid. Cells were harvested at 24 h post transfection. Data are  
879 represented as mean  $\pm$  SEM.

880 (B) Luciferase assay was carried out in the same condition as in (A) except that TBK1-  
881 expressing plasmid was used instead of STING-expressing plasmid.

882 (C) Luciferase assay was carried out in the same condition as in (A) except that MAVS-  
883 expressing plasmid was used.

884 (D) Luciferase assay was carried out in the same condition as in (A) except that TRIF-expressing  
885 plasmid was used.

886 (E) Luciferase assay was carried out in the same condition as in (A) except that TLR3-expressing  
887 plasmid was used. 24 h post transfection, cells were treated with poly I:C for another 24 h before  
888 harvesting.

889 (F) Luciferase assay was carried out in the same condition as in (A) except that IRF3-expressing  
890 plasmid was used.

891 (G) Luciferase assay was carried out in the same condition as in (A) except that IRF3-5D-  
892 expressing plasmid was used.

893 (H) Dual-luciferase assay of HEK293T cells transfected with NFkB-firefly luciferase reporter, a  
894 control plasmid pRL-TK expressing *Renilla* luciferase, vaccinia C7L-expressing or control  
895 plasmid, and TRIF-expressing plasmid. Cells were harvested at 24 h post transfection. Data are  
896 represented as mean  $\pm$  SEM.

897 (I) RAW264.7 stable cell line expressing vaccinia C7 (RAW264.7-C7L) or with empty vector  
898 (RAW264.7-EV) were infected with Sendai virus (SeV) or treated with poly I:C. Cells were  
899 collected 24 h later. IFNB gene expression level was measured by quantitative real-time PCR.  
900 Data are represented as mean  $\pm$  SEM.

901 (J) RAW264.7-C7L or RAW264.7-EV were transfected with interferon stimulatory DNA (ISD)  
902 or infected with heat-inactivated MVA (Heat-iMVA). Cells were collected 24 h later. IFNB gene  
903 expression level was measured.

904 (K) THP-1 stable cell line expressing vaccinia C7 (THP-1-C7L) or with empty vector (THP-1-  
905 EV) were infected with Sendai virus (SeV) or treated with poly I:C. Cells were collected 24 h  
906 later. IFNB gene expression level was measured. Data are represented as mean  $\pm$  SEM.  
907 (L) THP-1-C7L or THP-1-EV were transfected with ISD or infected with Heat-iMVA. Cells  
908 were collected 24 h later. IFNB gene expression level was measured.  
909 (M) Bone marrow-derived dendritic cells (BMDCs) were infected with either MVA or  
910 MVA $\Delta$ C7L at a MOI of 10. Cells were collected at 3 h and 6 h post infection. The IFNB gene  
911 expression levels were determined by quantitative PCR analyses. Data are represented as mean  
912  $\pm$  SEM.  
913 (N) BMDCs were infected with either WT VACV, VACV $\Delta$ C7L, MVA, or MVA $\Delta$ C7L at a MOI  
914 of 10. Supernatants were collected at 22 h post infection. The IFN- $\beta$  levels in the supernatants  
915 were determined by ELISA.  
916 (O) Western blot analyses of lysates from MVA or MVA $\Delta$ C7L infected BMDCs. Cells were  
917 collected at 2, 4, and 8 h post infection. Anti-phospho-IRF3, -IRF3, - $\beta$ -actin, and -C7 antibodies  
918 were used. A representative experiment is shown, repeated once.  
919 (P) HEK293T cells were co-transfected with Flag-tagged IRF3 or C7L either alone or in  
920 combination. The whole cell lysates were blotted with anti-Flag and anti-C7 antibody.  
921 (Q) Same as in (P). The whole cell lysates were immunoprecipitated with anti-C7 antibody, and  
922 immunoblotted with anti-Flag antibody.

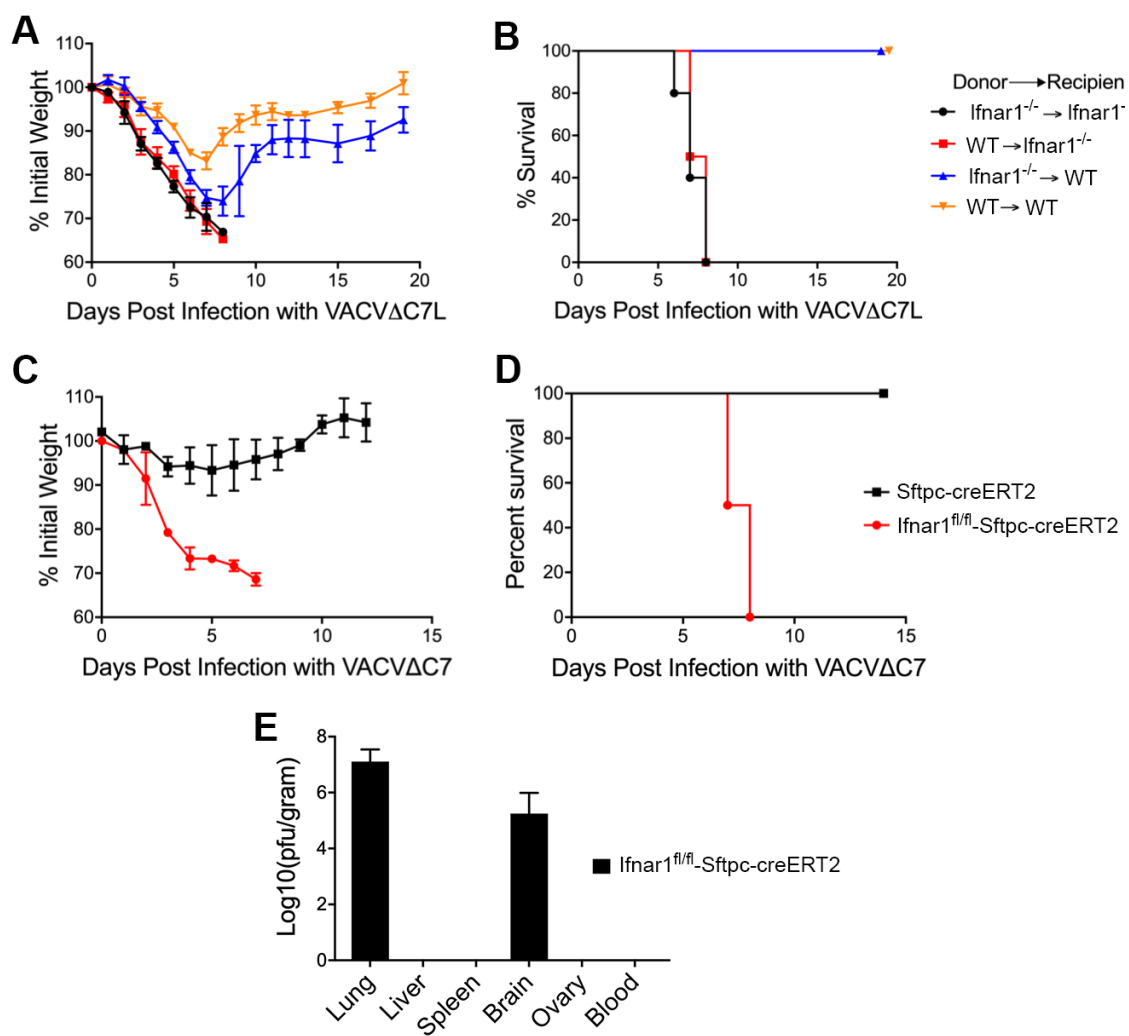

923 **Figure 4. Type I IFN signaling in lung non-hemopoietic resident cells plays crucial role in**  
924 **host restriction of vaccinia infection.**

925 (A) shown are the percentages of initial weight over days post intranasal infection with  
926 VACV $\Delta$ C7L at  $2 \times 10^7$  pfu in bone marrow chimeras (Ifnar1<sup>-/-</sup> → Ifnar1<sup>-/-</sup>, WT → WT, Ifnar1<sup>-/-</sup> →  
927 WT, and WT → Ifnar1<sup>-/-</sup>).

928 (B) Kaplan-Meier survival curve of bone marrow chimeras (Ifnar1<sup>-/-</sup> → Ifnar1<sup>-/-</sup>, WT → WT,  
929 Ifnar1<sup>-/-</sup> → WT, and WT → Ifnar1<sup>-/-</sup>) infected with VACV $\Delta$ C7L at  $2 \times 10^7$  pfu (n=5 in each  
930 group). A representative experiment is shown, repeated once.

931 (C) shown are the percentages of initial weight over days post intranasal infection with  
932 VACV $\Delta$ C7L at  $2 \times 10^7$  pfu in Ifnar1<sup>fl/fl</sup>-Sftpc<sup>creERT2</sup> and Sftpc<sup>creERT2</sup> mice treated with tamoxifen.

933 (D) Kaplan-Meier survival curve of tamoxifen-treated Ifnar1<sup>fl/fl</sup>-Sftpc<sup>creERT2</sup> and Sftpc<sup>creERT2</sup> mice  
934 infected with VACV $\Delta$ C7L at  $2 \times 10^7$  pfu (n=5 in each group). A representative experiment is  
935 shown, repeated once.

936 (E) Titers of VACV $\Delta$ C7L in the lungs, livers, spleens, blood, and brains of tamoxifen-treated  
937 Ifnar1<sup>fl/fl</sup>-Sftpc<sup>creERT2</sup> at day 7 or 8 post intranasal infection with VACV $\Delta$ C7L at a dose of  $2 \times 10^7$   
938 pfu. Data are represented as mean  $\pm$  SEM (n=3-5).

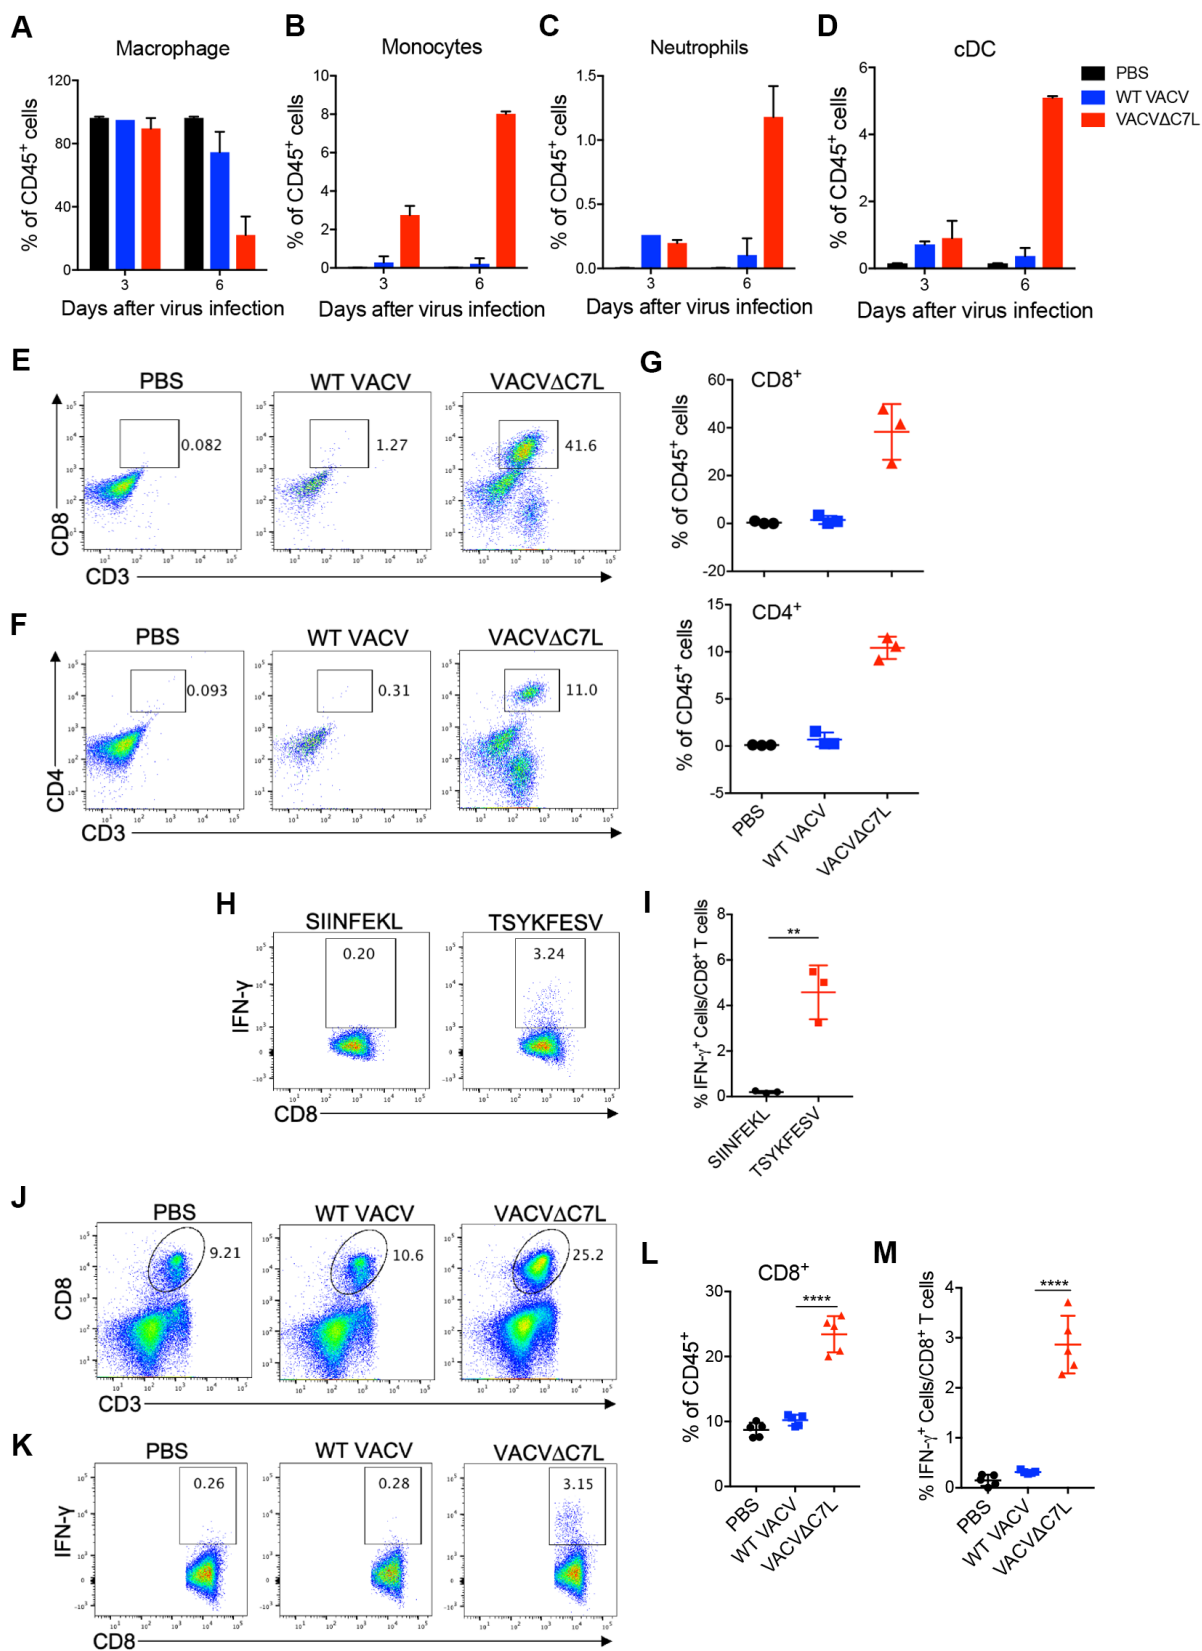

939 **Figure 5. Intranasal infection of VACV $\Delta$ C7L results in the recruitment of monocytes, DCs,**  
940 **neutrophils, CD8<sup>+</sup>, and CD4<sup>+</sup> T cells into the infected lungs.**

941 (A-D) graphs of percentages of alveolar macrophages, monocytes, DCs, neutrophils out of  
942 CD45<sup>+</sup> cells in the BAL of mice at day 3 and 6 post infection with either WT VACV or  
943 VACV $\Delta$ C7L. A representative experiment is shown, repeated once.

944 (E and F) Dot plots of CD8<sup>+</sup> and CD4<sup>+</sup> T cells in the BAL of mice at day 6 post infection with  
945 either WT VACV or VACV $\Delta$ C7L. PBS was used as mock infection control.

946 (G) Graphs showing percentages of CD8<sup>+</sup> and CD4<sup>+</sup> T cells out of CD45<sup>+</sup> cells in the BAL of  
947 mice at day 6 post infection with WT VACV or VACV $\Delta$ C7L.

948 (H and I) Dot plots (H) and graph (I) showing B8 epitope (TSYKFESV)-specific IFN- $\gamma$ <sup>+</sup> CD8<sup>+</sup> T  
949 cells in the BAL of mice at day 6 post infection with VACV $\Delta$ C7L. SIINFEKL peptide was used  
950 as a negative control (n=3).

951 (J and L) Dot plots (J) and graph (L) showing percentages of CD8<sup>+</sup> T cells out of CD45<sup>+</sup> cells in  
952 the lungs of mice at day 6 post infection with either WT VACV or VACV $\Delta$ C7L. PBS was used  
953 as mock infection control (n=5).

954 (K and M) Dot plots (K) and graph (M) showing B8-specific IFN- $\gamma$ <sup>+</sup> CD8<sup>+</sup> T in the lungs of mice  
955 at day 6 post infection with either WT VACV or VACV $\Delta$ C7L. PBS was used as mock infection  
956 control (n=5). A representative experiment is shown, repeated once.



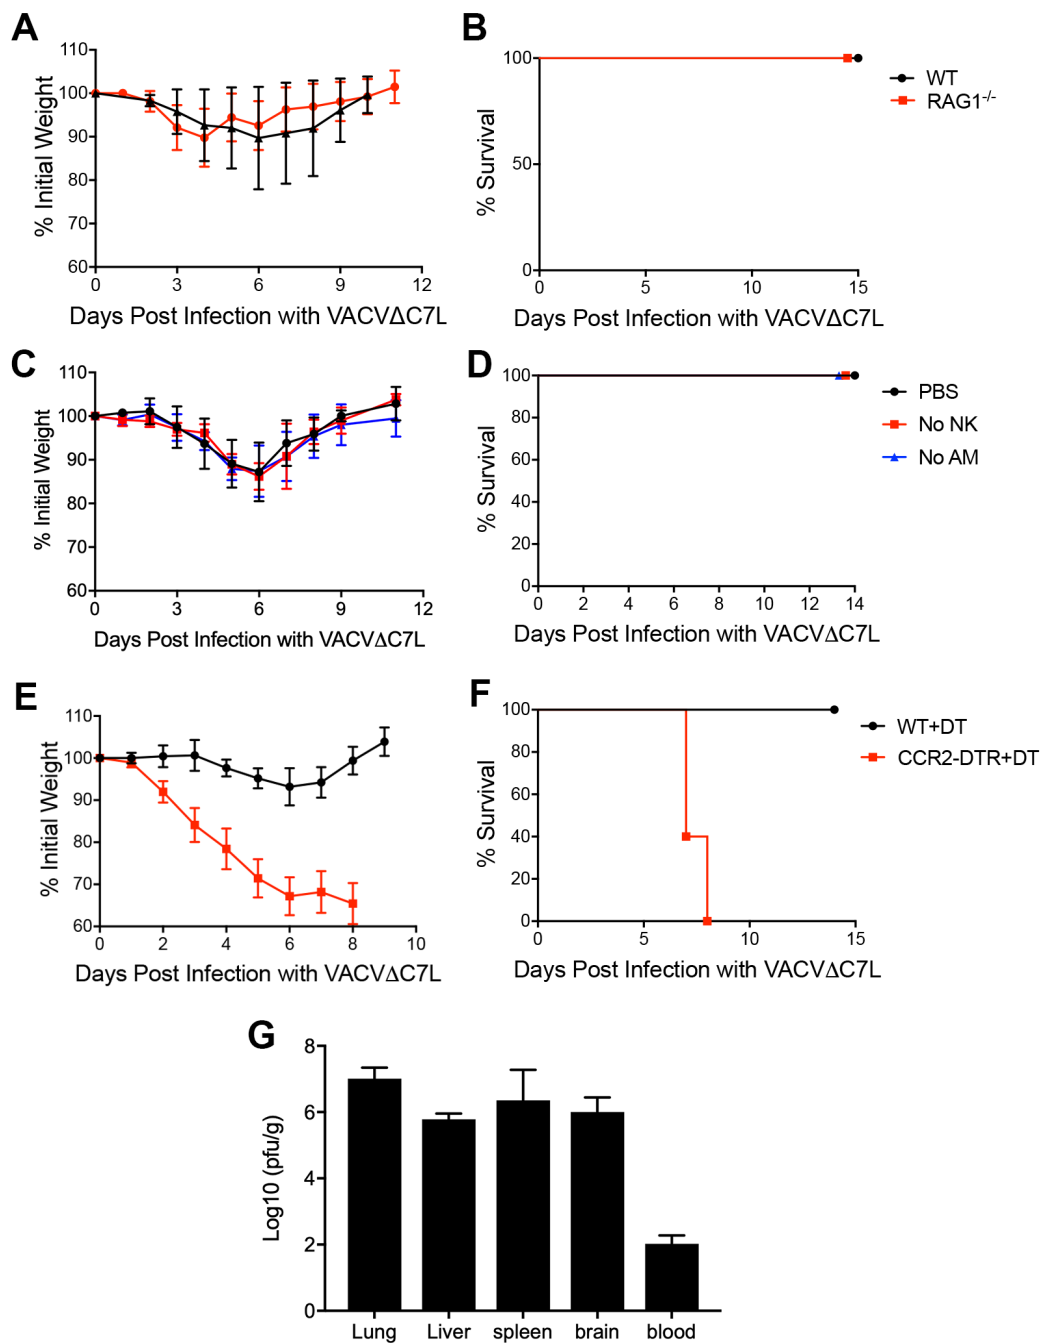

957 **Figure 6. CCR2<sup>+</sup> inflammatory monocytes plays important roles in restricting VACVΔC7L**  
958 **infection in the lungs and in preventing systemic dissemination.**

959 (A) shown are the percentages of initial weight over days post intranasal infection with  
960 VACVΔC7L at  $2 \times 10^7$  pfu in RAG1<sup>-/-</sup> and age-matched WT C57BL/6J mice.

961 (B) Kaplan-Meier survival curve of RAG1<sup>-/-</sup> and age-matched WT C57BL/6J mice infection with  
962 VACVΔC7L at  $2 \times 10^7$  pfu (n=5 in each group).

963 (C) shown are the percentages of initial weight over days post intranasal infection with  
964 VACVΔC7L at  $2 \times 10^7$  pfu in WT C57BL/6J mice treated with anti-NK antibody or with  
965 liposomal clodronate delivered intranasally.

966 (D) Kaplan-Meier survival curve of WT C57BL/6J mice treated with anti-NK antibody or with  
967 liposomal clodronate infected with VACVΔC7L at  $2 \times 10^7$  pfu (n=5 in each group). A  
968 representative experiment is shown, repeated once.

969 (E) shown are the percentages of initial weight over days post intranasal infection with  
970 VACVΔC7L at  $2 \times 10^7$  pfu in CCR2-DTR and age-matched WT C57BL/6J mice treated with  
971 DT.

972 (F) Kaplan-Meier survival curve of CCR2-DTR and age-matched WT C57BL/6J mice treated  
973 with DT infected with VACVΔC7L at  $2 \times 10^7$  pfu (n=5 in each group). A representative  
974 experiment is shown, repeated once.

975 (G) Titers of VACVΔC7L in the lungs, livers, spleens, blood, and brains of CCR2-DTR mice  
976 treated with DT at day 7 or 8 post intranasal infection with VACVΔC7L at a dose of  $2 \times 10^7$  pfu.  
977 Data are represented as mean  $\pm$  SEM (n=3-5).

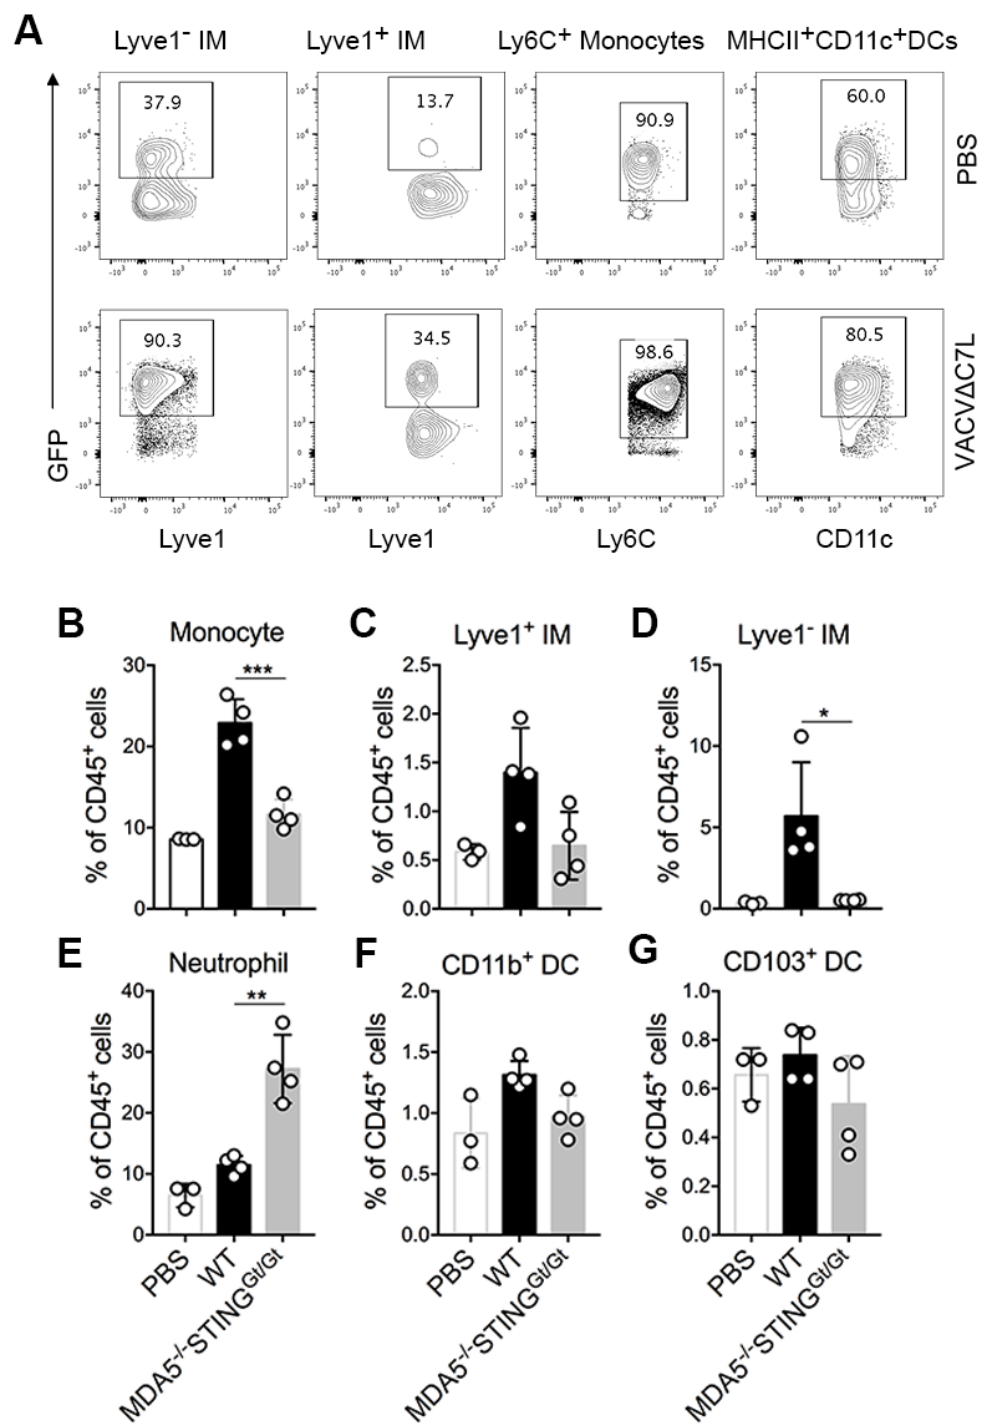

978 **Figure 7. CCR2<sup>+</sup> inflammatory monocytes differentiate into interstitial macrophages (IMs),**  
979 **DCs in the lungs upon VACVΔC7L infection.**

980 (A) dot plots showing an increase of GFP<sup>+</sup> Lyve1<sup>-</sup> IMs, GFP<sup>+</sup>Lyve1<sup>+</sup> IMs, and GFP<sup>+</sup>Ly6C<sup>+</sup>  
981 monocytes and GFP<sup>+</sup>MHCII<sup>+</sup>CD11C<sup>+</sup> DCs in the lungs of CCR2-GFP mice at day 3 post  
982 infection with VACVΔC7L compared with PBS-mock infected mice.

983 (B-G) graphs showing percentages of Ly6C<sup>+</sup> monocytes, Lyve1<sup>+</sup> IMs, Lyve1<sup>-</sup> IMs, Ly6G<sup>+</sup>  
984 neutrophils, CD11b<sup>+</sup> DCs, and CD103<sup>+</sup> DCs out of CD45<sup>+</sup> cells in the lungs of WT and MDA5<sup>-/-</sup>  
985 STING<sup>Gt/Gt</sup> mice at day 3 post VACVΔC7L infection. Data are represented as mean ± SEM (n=3-  
986 4). PBS mock infection control was performed in WT mice.

987 **REFERENCES**

- 988
- 989 Brady, G., and Bowie, A.G. (2014). Innate immune activation of NFkappaB and its antagonism  
990 by poxviruses. *Cytokine & growth factor reviews* 25, 611-620.
- 991 Chakarov, S., Lim, H.Y., Tan, L., Lim, S.Y., See, P., Lum, J., Zhang, X.M., Foo, S., Nakamizo,  
992 S., Duan, K., *et al.* (2019). Two distinct interstitial macrophage populations coexist across tissues  
993 in specific subtissular niches. *Science* 363.
- 994 Dai, P., Wang, W., Cao, H., Avogadri, F., Dai, L., Drexler, I., Joyce, J.A., Li, X.D., Chen, Z.,  
995 Merghoub, T., *et al.* (2014). Modified vaccinia virus Ankara triggers type I IFN production in  
996 murine conventional dendritic cells via a cGAS/STING-mediated cytosolic DNA-sensing  
997 pathway. *PLoS Pathog* 10, e1003989.
- 998 Dai, P., Wang, W., Yang, N., Serna-Tamayo, C., Ricca, J.M., Zamarin, D., Shuman, S.,  
999 Merghoub, T., Wolchok, J.D., and Deng, L. (2017). Intratumoral delivery of inactivated  
1000 modified vaccinia virus Ankara (iMVA) induces systemic antitumor immunity via STING and  
1001 Batf3-dependent dendritic cells. *Sci Immunol* 2.
- 1002 Deng, L., Dai, P., Parikh, T., Cao, H., Bhoj, V., Sun, Q., Chen, Z., Merghoub, T., Houghton, A.,  
1003 and Shuman, S. (2008). Vaccinia virus subverts a mitochondrial antiviral signaling protein-  
1004 dependent innate immune response in keratinocytes through its double-stranded RNA binding  
1005 protein, E3. *J Virol* 82, 10735-10746.
- 1006 Desai, P., Tahiliani, V., Abboud, G., Stanfield, J., and Salek-Ardakani, S. (2018). Batf3-  
1007 Dependent Dendritic Cells Promote Optimal CD8 T Cell Responses against Respiratory  
1008 Poxvirus Infection. *J Virol* 92.
- 1009 Galani, I.E., Triantafyllia, V., Eleminiadou, E.E., Koltsida, O., Stavropoulos, A., Manioudaki,  
1010 M., Thanos, D., Doyle, S.E., Kotenko, S.V., Thanopoulou, K., *et al.* (2017). Interferon-lambda  
1011 Mediates Non-redundant Front-Line Antiviral Protection against Influenza Virus Infection  
1012 without Compromising Host Fitness. *Immunity* 46, 875-890 e876.
- 1013 Gitlin, L., Benoit, L., Song, C., Cella, M., Gilfillan, S., Holtzman, M.J., and Colonna, M. (2010).  
1014 Melanoma differentiation-associated gene 5 (MDA5) is involved in the innate immune response  
1015 to Paramyxoviridae infection in vivo. *PLoS Pathog* 6, e1000734.

- 1016 Goulding, J., Abboud, G., Tahiliani, V., Desai, P., Hutchinson, T.E., and Salek-Ardakani, S.  
1017 (2014). CD8 T cells use IFN-gamma to protect against the lethal effects of a respiratory poxvirus  
1018 infection. *J Immunol* *192*, 5415-5425.
- 1019 Goulding, J., Bogue, R., Tahiliani, V., Croft, M., and Salek-Ardakani, S. (2012). CD8 T cells are  
1020 essential for recovery from a respiratory vaccinia virus infection. *J Immunol* *189*, 2432-2440.
- 1021 Hohl, T.M., Rivera, A., Lipuma, L., Gallegos, A., Shi, C., Mack, M., and Pamer, E.G. (2009).  
1022 Inflammatory monocytes facilitate adaptive CD4 T cell responses during respiratory fungal  
1023 infection. *Cell host & microbe* *6*, 470-481.
- 1024 Iijima, N., Mattei, L.M., and Iwasaki, A. (2011). Recruited inflammatory monocytes stimulate  
1025 antiviral Th1 immunity in infected tissue. *Proc Natl Acad Sci U S A* *108*, 284-289.
- 1026 Kawai, T., Takahashi, K., Sato, S., Coban, C., Kumar, H., Kato, H., Ishii, K.J., Takeuchi, O., and  
1027 Akira, S. (2005). IPS-1, an adaptor triggering RIG-I- and Mda5-mediated type I interferon  
1028 induction. *Nat Immunol* *6*, 981-988.
- 1029 Lin, K.L., Suzuki, Y., Nakano, H., Ramsburg, E., and Gunn, M.D. (2008). CCR2+ monocyte-  
1030 derived dendritic cells and exudate macrophages produce influenza-induced pulmonary immune  
1031 pathology and mortality. *J Immunol* *180*, 2562-2572.
- 1032 Liu, J., Wennier, S., Zhang, L., and McFadden, G. (2011). M062 is a host range factor essential  
1033 for myxoma virus pathogenesis and functions as an antagonist of host SAMD9 in human cells. *J*  
1034 *Virology* *85*, 3270-3282.
- 1035 Meng, X., Schoggins, J., Rose, L., Cao, J., Ploss, A., Rice, C.M., and Xiang, Y. (2012). C7L  
1036 family of poxvirus host range genes inhibits antiviral activities induced by type I interferons and  
1037 interferon regulatory factor 1. *J Virol* *86*, 4538-4547.
- 1038 Meng, X., Zhang, F., Yan, B., Si, C., Honda, H., Nagamachi, A., Sun, L.Z., and Xiang, Y.  
1039 (2018). A paralogous pair of mammalian host restriction factors form a critical host barrier  
1040 against poxvirus infection. *PLoS Pathog* *14*, e1006884.
- 1041 Muller, U., Steinhoff, U., Reis, L.F., Hemmi, S., Pavlovic, J., Zinkernagel, R.M., and Aguet, M.  
1042 (1994). Functional role of type I and type II interferons in antiviral defense. *Science* *264*, 1918-  
1043 1921.
- 1044 Perkus, M.E., Goebel, S.J., Davis, S.W., Johnson, G.P., Limbach, K., Norton, E.K., and Paoletti,  
1045 E. (1990). Vaccinia virus host range genes. *Virology* *179*, 276-286.

- 1046 Rivera, R., Hutchens, M., Luker, K.E., Sonstein, J., Curtis, J.L., and Luker, G.D. (2007). Murine  
1047 alveolar macrophages limit replication of vaccinia virus. *Virology* *363*, 48-58.
- 1048 Rock, J.R., Barkauskas, C.E., Crouce, M.J., Xue, Y., Harris, J.R., Liang, J., Noble, P.W., and  
1049 Hogan, B.L. (2011). Multiple stromal populations contribute to pulmonary fibrosis without  
1050 evidence for epithelial to mesenchymal transition. *Proc Natl Acad Sci U S A* *108*, E1475-1483.
- 1051 Scheu, S., Dresing, P., and Locksley, R.M. (2008). Visualization of IFN $\beta$  production by  
1052 plasmacytoid versus conventional dendritic cells under specific stimulation conditions in vivo.  
1053 *Proc Natl Acad Sci U S A* *105*, 20416-20421.
- 1054 Schneider, C., Nobs, S.P., Heer, A.K., Kurrer, M., Klinke, G., van Rooijen, N., Vogel, J., and  
1055 Kopf, M. (2014). Alveolar macrophages are essential for protection from respiratory failure and  
1056 associated morbidity following influenza virus infection. *PLoS Pathog* *10*, e1004053.
- 1057 Schoggins, J.W., MacDuff, D.A., Imanaka, N., Gainey, M.D., Shrestha, B., Eitson, J.L., Mar,  
1058 K.B., Richardson, R.B., Ratushny, A.V., Litvak, V., *et al.* (2014). Pan-viral specificity of IFN-  
1059 induced genes reveals new roles for cGAS in innate immunity. *Nature* *505*, 691-695.
- 1060 Seet, B.T., Johnston, J.B., Brunetti, C.R., Barrett, J.W., Everett, H., Cameron, C., Sypula, J.,  
1061 Nazarian, S.H., Lucas, A., and McFadden, G. (2003). Poxviruses and immune evasion. *Annu*  
1062 *Rev Immunol* *21*, 377-423.
- 1063 Sivan, G., Ormanoglu, P., Buehler, E.C., Martin, S.E., and Moss, B. (2015). Identification of  
1064 Restriction Factors by Human Genome-Wide RNA Interference Screening of Viral Host Range  
1065 Mutants Exemplified by Discovery of SAMD9 and WDR6 as Inhibitors of the Vaccinia Virus  
1066 K1L-C7L- Mutant. *mBio* *6*, e01122.
- 1067 Stegemann-Koniszewski, S., Jeron, A., Gereke, M., Geffers, R., Kroger, A., Gunzer, M., and  
1068 Bruder, D. (2016). Alveolar Type II Epithelial Cells Contribute to the Anti-Influenza A Virus  
1069 Response in the Lung by Integrating Pathogen- and Microenvironment-Derived Signals. *mBio* *7*.
- 1070 Tanaka, M., Shimbo, T., Kikuchi, Y., Matsuda, M., and Kaneda, Y. (2010). Sterile alpha motif  
1071 containing domain 9 is involved in death signaling of malignant glioma treated with inactivated  
1072 Sendai virus particle (HVJ-E) or type I interferon. *International journal of cancer Journal*  
1073 *international du cancer* *126*, 1982-1991.
- 1074 van den Broek, M.F., Muller, U., Huang, S., Zinkernagel, R.M., and Aguet, M. (1995). Immune  
1075 defence in mice lacking type I and/or type II interferon receptors. *Immunol Rev* *148*, 5-18.

1076 Weinheimer, V.K., Becher, A., Tonnies, M., Holland, G., Knepper, J., Bauer, T.T., Schneider, P.,  
1077 Neudecker, J., Ruckert, J.C., Szymanski, K., *et al.* (2012). Influenza A viruses target type II  
1078 pneumocytes in the human lung. *J Infect Dis* 206, 1685-1694.  
1079 Yu, W.C., Chan, R.W., Wang, J., Travanty, E.A., Nicholls, J.M., Peiris, J.S., Mason, R.J., and  
1080 Chan, M.C. (2011). Viral replication and innate host responses in primary human alveolar  
1081 epithelial cells and alveolar macrophages infected with influenza H5N1 and H1N1 viruses. *J*  
1082 *Virol* 85, 6844-6855.  
1083
